# Supplementary material for: Robson 10-groups classification system to access C-section in two public hospitals of the Federal District/Brazil
Source: PLoS One. 2018 Feb 20;13(2):e0192997. doi: 10.1371/journal.pone.0192997 (PMC5819776; doi:10.1371/journal.pone.0192997)
Supplement: S1 File — (XLSX) [file pone.0192997.s001.xlsx]

## Sheet: Recovered_Sheet1
Hospital	Age	Type of birth	Parity	Uterine scar	Type of gestation	Onset of labor	Gestational age	Fetal presentation	Robson classification
HA	27	C_section	Nuliparous	No	Singleton	Spontaneous labor	36	Cephalic	10
HA	22	C_section	Nuliparous	No	Singleton	Spontaneous labor	36	Cephalic	10
HA	16	C_section	Nuliparous	No	Singleton	Spontaneous labor	35	Cephalic	10
HA	36	C_section	Multiparous	No	Singleton	C-section before labor	28	Cephalic	10
HB	36	C_section	Nuliparous	No	Singleton	C-section before labor	36	Cephalic	10
HA	32	C_section	Multiparous	No	Singleton	C-section before labor	35	Cephalic	10
HA	28	C_section	Multiparous	Yes	Singleton	C-section before labor	31	Cephalic	10
HA	28	C_section	Multiparous	Yes	Singleton	C-section before labor	27	Cephalic	10
HA	25	C_section	Nuliparous	No	Singleton	C-section before labor	30	Cephalic	10
HA	25	C_section	Nuliparous	No	Singleton	C-section before labor	36	Cephalic	10
HA	22	C_section	Nuliparous	No	Singleton	C-section before labor	33	Cephalic	10
HA	24	C_section	Nuliparous	No	Singleton	C-section before labor	30	Cephalic	10
HA	43	C_section	Multiparous	No	Singleton	C-section before labor	35	Cephalic	10
HB	37	C_section	Multiparous	No	Singleton	C-section before labor	34	Cephalic	10
HA	31	C_section	Nuliparous	No	Singleton	Spontaneous labor	36	Cephalic	10
HB	31	C_section	Nuliparous	No	Singleton	C-section before labor	36	Cephalic	10
HA	31	C_section	Multiparous	No	Singleton	Induced labor	31	Cephalic	10
HB	31	C_section	Multiparous	No	Singleton	C-section before labor	32	Cephalic	10
HA	27	C_section	Multiparous	Yes	Singleton	Spontaneous labor	34	Cephalic	10
HA	27	C_section	Nuliparous	No	Singleton	Spontaneous labor	36	Cephalic	10
HA	27	C_section	Nuliparous	No	Singleton	Spontaneous labor	36	Cephalic	10
HA	26	C_section	Multiparous	No	Singleton	Spontaneous labor	34	Cephalic	10
HA	24	C_section	Multiparous	No	Singleton	Spontaneous labor	34	Cephalic	10
HA	24	C_section	Nuliparous	No	Singleton	C-section before labor	34	Cephalic	10
HA	23	C_section	Nuliparous	No	Singleton	Spontaneous labor	36	Cephalic	10
HA	23	C_section	Multiparous	No	Singleton	C-section before labor	30	Cephalic	10
HB	22	C_section	Multiparous	No	Singleton	Spontaneous labor	36	Cephalic	10
HB	21	C_section	Nuliparous	No	Singleton	Induced labor	36	Cephalic	10
HA	21	C_section	Nuliparous	No	Singleton	Spontaneous labor	32	Cephalic	10
HA	18	C_section	Nuliparous	No	Singleton	Spontaneous labor	34	Cephalic	10
HA	16	C_section	Nuliparous	No	Singleton	Spontaneous labor	36	Cephalic	10
HA	16	C_section	Nuliparous	No	Singleton	C-section before labor	35	Cephalic	10
HA	16	C_section	Nuliparous	No	Singleton	C-section before labor	36	Cephalic	10
HB	15	C_section	Nuliparous	No	Singleton	Spontaneous labor	34	Cephalic	10
HA	39	C_section	Multiparous	Yes	Singleton	C-section before labor	35	Cephalic	10
HA	30	C_section	Multiparous	Yes	Singleton	C-section before labor	28	Cephalic	10
HA	30	C_section	Nuliparous	No	Singleton	Spontaneous labor	36	Cephalic	10
HA	25	C_section	Nuliparous	No	Singleton	C-section before labor	35	Cephalic	10
HB	20	C_section	Nuliparous	No	Singleton	C-section before labor	36	Cephalic	10
HA	23	C_section	Multiparous	Yes	Singleton	Spontaneous labor	35	Cephalic	10
HA	35	C_section	Multiparous	Yes	Singleton	C-section before labor	33	Cephalic	10
HA	26	C_section	Multiparous	No	Singleton	C-section before labor	22	Cephalic	10
HA	44	C_section	Multiparous	Yes	Singleton	C-section before labor	34	Cephalic	10
HA	44	C_section	Nuliparous	No	Singleton	C-section before labor	31	Cephalic	10
HB	41	C_section	Multiparous	Yes	Singleton	C-section before labor	35	Cephalic	10
HA	40	C_section	Multiparous	Yes	Singleton	C-section before labor	29	Cephalic	10
HA	39	C_section	Multiparous	Yes	Singleton	C-section before labor	32	Cephalic	10
HB	39	C_section	Multiparous	No	Singleton	C-section before labor	34	Cephalic	10
HB	39	C_section	Multiparous	No	Singleton	C-section before labor	34	Cephalic	10
HA	38	C_section	Multiparous	No	Singleton	C-section before labor	30	Cephalic	10
HB	38	C_section	Nuliparous	No	Singleton	C-section before labor	35	Cephalic	10
HA	37	C_section	Multiparous	Yes	Singleton	C-section before labor	35	Cephalic	10
HB	36	C_section	Multiparous	No	Singleton	C-section before labor	32	Cephalic	10
HA	35	C_section	Multiparous	Yes	Singleton	C-section before labor	36	Cephalic	10
HA	34	C_section	Nuliparous	No	Singleton	C-section before labor	25	Cephalic	10
HA	34	C_section	Multiparous	Yes	Singleton	C-section before labor	35	Cephalic	10
HA	34	C_section	Nuliparous	No	Singleton	C-section before labor	32	Cephalic	10
HA	34	C_section	Multiparous	Yes	Singleton	C-section before labor	36	Cephalic	10
HA	34	C_section	Multiparous	No	Singleton	C-section before labor	28	Cephalic	10
HA	34	C_section	Multiparous	Yes	Singleton	C-section before labor	36	Cephalic	10
HB	34	C_section	Multiparous	Yes	Singleton	C-section before labor	36	Cephalic	10
HB	34	C_section	Multiparous	Yes	Singleton	Spontaneous labor	36	Cephalic	10
HB	34	C_section	Multiparous	Yes	Singleton	C-section before labor	35	Cephalic	10
HA	33	C_section	Nuliparous	No	Singleton	C-section before labor	29	Cephalic	10
HA	33	C_section	Multiparous	No	Singleton	C-section before labor	28	Cephalic	10
HA	33	C_section	Nuliparous	No	Singleton	C-section before labor	25	Cephalic	10
HA	33	C_section	Nuliparous	No	Singleton	C-section before labor	31	Cephalic	10
HB	32	C_section	Multiparous	No	Singleton	C-section before labor	36	Cephalic	10
HA	31	C_section	Multiparous	Yes	Singleton	C-section before labor	29	Cephalic	10
HB	30	C_section	Multiparous	Yes	Singleton	C-section before labor	34	Cephalic	10
HA	29	C_section	Multiparous	No	Singleton	C-section before labor	35	Cephalic	10
HB	29	C_section	Nuliparous	No	Singleton	C-section before labor	28	Cephalic	10
HA	27	C_section	Multiparous	No	Singleton	C-section before labor	34	Cephalic	10
HB	27	C_section	Multiparous	Yes	Singleton	C-section before labor	36	Cephalic	10
HB	27	C_section	Multiparous	No	Singleton	C-section before labor	34	Cephalic	10
HA	26	C_section	Nuliparous	No	Singleton	C-section before labor	30	Cephalic	10
HB	26	C_section	Multiparous	No	Singleton	C-section before labor	34	Cephalic	10
HA	25	C_section	Nuliparous	No	Singleton	C-section before labor	30	Cephalic	10
HA	25	C_section	Multiparous	No	Singleton	C-section before labor	32	Cephalic	10
HA	24	C_section	Nuliparous	No	Singleton	C-section before labor	34	Cephalic	10
HB	24	C_section	Nuliparous	No	Singleton	Induced labor	34	Cephalic	10
HA	23	C_section	Multiparous	Yes	Singleton	C-section before labor	36	Cephalic	10
HA	21	C_section	Multiparous	Yes	Singleton	C-section before labor	34	Cephalic	10
HA	20	C_section	Multiparous	Yes	Singleton	Spontaneous labor	34	Cephalic	10
HB	20	C_section	Nuliparous	No	Singleton	C-section before labor	33	Cephalic	10
HA	19	C_section	Nuliparous	No	Singleton	C-section before labor	35	Cephalic	10
HA	35	C_section	Multiparous	No	Singleton	Spontaneous labor	35	Cephalic	10
HA	34	C_section	Multiparous	Yes	Singleton	Spontaneous labor	35	Cephalic	10
HA	34	C_section	Nuliparous	No	Singleton	Spontaneous labor	31	Cephalic	10
HA	30	C_section	Nuliparous	No	Singleton	Spontaneous labor	33	Cephalic	10
HA	29	C_section	Multiparous	Yes	Singleton	Spontaneous labor	36	Cephalic	10
HA	27	C_section	Multiparous	Yes	Singleton	Spontaneous labor	36	Cephalic	10
HA	27	C_section	Multiparous	Yes	Singleton	Spontaneous labor	34	Cephalic	10
HB	24	C_section	Nuliparous	No	Singleton	Spontaneous labor	36	Cephalic	10
HA	18	C_section	Nuliparous	No	Singleton	Spontaneous labor	33	Cephalic	10
HA	44	C_section	Nuliparous	No	Singleton	C-section before labor	34	Cephalic	10
HA	42	C_section	Multiparous	Yes	Singleton	C-section before labor	33	Cephalic	10
HA	35	C_section	Multiparous	No	Singleton	C-section before labor	36	Cephalic	10
HA	35	C_section	Multiparous	Yes	Singleton	C-section before labor	32	Cephalic	10
HA	32	C_section	Multiparous	Yes	Singleton	C-section before labor	33	Cephalic	10
HA	31	C_section	Nuliparous	No	Singleton	Spontaneous labor	36	Cephalic	10
HA	30	C_section	Multiparous	No	Singleton	C-section before labor	29	Cephalic	10
HA	28	C_section	Multiparous	Yes	Singleton	C-section before labor	36	Cephalic	10
HA	27	C_section	Multiparous	No	Singleton	C-section before labor	36	Cephalic	10
HA	24	C_section	Nuliparous	No	Singleton	C-section before labor	36	Cephalic	10
HA	24	C_section	Multiparous	No	Singleton	C-section before labor	35	Cephalic	10
HB	23	C_section	Nuliparous	No	Singleton	C-section before labor	34	Cephalic	10
HA	22	C_section	Multiparous	Yes	Singleton	C-section before labor	36	Cephalic	10
HA	22	C_section	Nuliparous	No	Singleton	C-section before labor	34	Cephalic	10
HA	21	C_section	Nuliparous	No	Singleton	C-section before labor	34	Cephalic	10
HB	18	C_section	Nuliparous	No	Singleton	C-section before labor	33	Cephalic	10
HB	17	C_section	Nuliparous	No	Singleton	C-section before labor	34	Cephalic	10
HA	26	C_section	Multiparous	Yes	Singleton	C-section before labor	35	Cephalic	10
HA	20	C_section	Nuliparous	No	Singleton	Spontaneous labor	36	Cephalic	10
HA	24	C_section	Multiparous	No	Singleton	C-section before labor	30	Cephalic	10
HA	37	C_section	Multiparous	Yes	Singleton	Spontaneous labor	34	Cephalic	10
HA	36	C_section	Multiparous	Yes	Singleton	C-section before labor	36	Cephalic	10
HA	36	C_section	Multiparous	No	Singleton	Spontaneous labor	30	Cephalic	10
HA	32	C_section	Nuliparous	No	Singleton	C-section before labor	33	Cephalic	10
HA	31	C_section	Multiparous	No	Singleton	C-section before labor	35	Cephalic	10
HA	31	C_section	Multiparous	No	Singleton	Spontaneous labor	35	Cephalic	10
HA	30	C_section	Multiparous	Yes	Singleton	C-section before labor	36	Cephalic	10
HA	25	C_section	Multiparous	No	Singleton	Spontaneous labor	36	Cephalic	10
HA	23	C_section	Nuliparous	No	Singleton	Spontaneous labor	32	Cephalic	10
HA	22	C_section	Multiparous	No	Singleton	Spontaneous labor	36	Cephalic	10
HA	22	C_section	Nuliparous	No	Singleton	Spontaneous labor	33	Cephalic	10
HA	21	C_section	Multiparous	No	Singleton	C-section before labor	33	Cephalic	10
HA	21	C_section	Nuliparous	No	Singleton	Spontaneous labor	33	Cephalic	10
HA	20	C_section	Nuliparous	No	Singleton	Spontaneous labor	35	Cephalic	10
HA	19	C_section	Multiparous	No	Singleton	Spontaneous labor	36	Cephalic	10
HA	17	C_section	Nuliparous	No	Singleton	Spontaneous labor	34	Cephalic	10
HA	17	C_section	Nuliparous	No	Singleton	Spontaneous labor	36	Cephalic	10
HA	15	C_section	Nuliparous	No	Singleton	C-section before labor	32	Cephalic	10
HA	41	C_section	Multiparous	Yes	Singleton	C-section before labor	35	Cephalic	10
HA	38	C_section	Multiparous	No	Singleton	Spontaneous labor	30	Cephalic	10
HA	21	C_section	Nuliparous	No	Singleton	C-section before labor	35	Cephalic	10
HB	43	C_section	Multiparous	Yes	Singleton	Spontaneous labor	35	Cephalic	10
HA	33	C_section	Multiparous	Yes	Singleton	Spontaneous labor	36	Cephalic	10
HA	31	C_section	Multiparous	Yes	Singleton	Spontaneous labor	34	Cephalic	10
HB	31	C_section	Multiparous	Yes	Singleton	Spontaneous labor	27	Cephalic	10
HA	30	C_section	Multiparous	Yes	Singleton	C-section before labor	34	Cephalic	10
HB	30	C_section	Multiparous	Yes	Singleton	C-section before labor	36	Cephalic	10
HA	29	C_section	Multiparous	Yes	Singleton	C-section before labor	30	Cephalic	10
HB	29	C_section	Multiparous	Yes	Singleton	Spontaneous labor	34	Cephalic	10
HB	28	C_section	Multiparous	Yes	Singleton	C-section before labor	36	Cephalic	10
HA	28	C_section	Multiparous	Yes	Singleton	Spontaneous labor	33	Cephalic	10
HA	25	C_section	Multiparous	Yes	Singleton	Spontaneous labor	36	Cephalic	10
HA	23	C_section	Multiparous	Yes	Singleton	Spontaneous labor	36	Cephalic	10
HA	20	C_section	Multiparous	Yes	Singleton	Spontaneous labor	35	Cephalic	10
HB	19	C_section	Multiparous	Yes	Singleton	Spontaneous labor	33	Cephalic	10
HB	18	C_section	Multiparous	Yes	Singleton	Spontaneous labor	33	Cephalic	10
HA	25	C_section	Multiparous	Yes	Singleton	C-section before labor	36	Cephalic	10
HA	35	C_section	Multiparous	No	Singleton	Spontaneous labor	35	Cephalic	10
HB	24	C_section	Multiparous	Yes	Singleton	C-section before labor	36	Cephalic	10
HB	15	C_section	Nuliparous	No	Singleton	Spontaneous labor	35	Cephalic	10
HA	34	C_section	Multiparous	No	Singleton	C-section before labor	33	Cephalic	10
HB	33	C_section	Multiparous	Yes	Singleton	C-section before labor	36	Cephalic	10
HB	31	C_section	Multiparous	Yes	Singleton	C-section before labor	36	Cephalic	10
HA	27	C_section	Nuliparous	No	Singleton	C-section before labor	36	Cephalic	10
HB	21	C_section	Multiparous	Yes	Singleton	C-section before labor	36	Cephalic	10
HB	20	C_section	Nuliparous	No	Singleton	Spontaneous labor	34	Cephalic	10
HB	41	C_section	Multiparous	No	Singleton	Induced labor	36	Cephalic	10
HB	35	C_section	Nuliparous	No	Singleton	Induced labor	35	Cephalic	10
HA	33	C_section	Nuliparous	No	Singleton	Induced labor	36	Cephalic	10
HB	31	C_section	Multiparous	No	Singleton	Induced labor	36	Cephalic	10
HA	21	C_section	Multiparous	No	Singleton	Induced labor	35	Cephalic	10
HA	21	C_section	Nuliparous	No	Singleton	Induced labor	35	Cephalic	10
HB	20	C_section	Nuliparous	No	Singleton	Induced labor	34	Cephalic	10
HB	18	C_section	Nuliparous	No	Singleton	Induced labor	36	Cephalic	10
HA	39	C_section	Multiparous	Yes	Singleton	C-section before labor	26	Cephalic	10
HB	41	C_section	Multiparous	Yes	Singleton	Spontaneous labor	36	Cephalic	10
HA	39	C_section	Multiparous	Yes	Singleton	C-section before labor	34	Cephalic	10
HA	35	C_section	Multiparous	No	Singleton	Spontaneous labor	32	Cephalic	10
HB	35	C_section	Multiparous	Yes	Singleton	Spontaneous labor	36	Cephalic	10
HB	34	C_section	Multiparous	No	Singleton	Spontaneous labor	33	Cephalic	10
HA	32	C_section	Nuliparous	No	Singleton	C-section before labor	28	Cephalic	10
HA	32	C_section	Multiparous	Yes	Singleton	C-section before labor	30	Cephalic	10
HA	30	C_section	Multiparous	No	Singleton	Spontaneous labor	33	Cephalic	10
HA	29	C_section	Multiparous	No	Singleton	C-section before labor	34	Cephalic	10
HA	28	C_section	Multiparous	Yes	Singleton	C-section before labor	36	Cephalic	10
HA	27	C_section	Multiparous	No	Singleton	Spontaneous labor	36	Cephalic	10
HA	27	C_section	Multiparous	No	Singleton	Spontaneous labor	34	Cephalic	10
HB	27	C_section	Multiparous	Yes	Singleton	Induced labor	29	Cephalic	10
HA	26	C_section	Multiparous	Yes	Singleton	Spontaneous labor	33	Cephalic	10
HB	26	C_section	Multiparous	No	Singleton	Spontaneous labor	35	Cephalic	10
HA	25	C_section	Nuliparous	No	Singleton	Spontaneous labor	36	Cephalic	10
HA	25	C_section	Multiparous	No	Singleton	Induced labor	33	Cephalic	10
HA	24	C_section	Multiparous	Yes	Singleton	Spontaneous labor	34	Cephalic	10
HA	23	C_section	Nuliparous	No	Singleton	Spontaneous labor	35	Cephalic	10
HA	21	C_section	Multiparous	Yes	Singleton	Spontaneous labor	31	Cephalic	10
HA	18	C_section	Multiparous	No	Singleton	C-section before labor	27	Breech	10
HA	16	C_section	Nuliparous	No	Singleton	Spontaneous labor	36	Cephalic	10
HA	15	C_section	Nuliparous	No	Singleton	Induced labor	34	Cephalic	10
HA	23	C_section	Multiparous	Yes	Singleton	Induced labor	36	Cephalic	10
HA	30	C_section	Nuliparous	No	Singleton	Spontaneous labor	34	Cephalic	10
HA	23	C_section	Nuliparous	No	Singleton	Induced labor	36	Cephalic	10
HA	34	C_section	Nuliparous	No	Singleton	Spontaneous labor	35	Cephalic	10
HA	33	C_section	Multiparous	No	Singleton	Spontaneous labor	36	Cephalic	10
HA	30	C_section	Multiparous	Yes	Singleton	Spontaneous labor	35	Cephalic	10
HA	29	C_section	Nuliparous	No	Singleton	Induced labor	36	Cephalic	10
HB	29	C_section	Nuliparous	No	Singleton	C-section before labor	36	Cephalic	10
HB	26	C_section	Multiparous	Yes	Singleton	C-section before labor	36	Cephalic	10
HA	26	C_section	Multiparous	No	Singleton	Spontaneous labor	36	Cephalic	10
HB	23	C_section	Nuliparous	No	Singleton	Spontaneous labor	36	Cephalic	10
HB	23	C_section	Multiparous	No	Singleton	Spontaneous labor	35	Cephalic	10
HA	35	C_section	Multiparous	No	Singleton	Induced labor	36	Cephalic	10
HA	44	C_section	Nuliparous	No	Singleton	C-section before labor	35	Cephalic	10
HA	37	C_section	Multiparous	No	Singleton	C-section before labor	26	Cephalic	10
HA	37	C_section	Multiparous	No	Singleton	C-section before labor	30	Cephalic	10
HA	37	C_section	Multiparous	No	Singleton	C-section before labor	27	Cephalic	10
HB	33	C_section	Nuliparous	No	Singleton	C-section before labor	34	Cephalic	10
HA	32	C_section	Multiparous	Yes	Singleton	C-section before labor	35	Cephalic	10
HA	31	C_section	Nuliparous	No	Singleton	C-section before labor	27	Cephalic	10
HA	31	C_section	Multiparous	Yes	Singleton	C-section before labor	34	Cephalic	10
HA	31	C_section	Nuliparous	No	Singleton	C-section before labor	36	Cephalic	10
HA	31	C_section	Nuliparous	No	Singleton	C-section before labor	27	Cephalic	10
HA	31	C_section	Nuliparous	No	Singleton	C-section before labor	36	Cephalic	10
HA	30	C_section	Multiparous	No	Singleton	Spontaneous labor	36	Cephalic	10
HB	30	C_section	Nuliparous	No	Singleton	C-section before labor	35	Cephalic	10
HA	26	C_section	Nuliparous	No	Singleton	C-section before labor	34	Cephalic	10
HA	23	C_section	Nuliparous	No	Singleton	C-section before labor	30	Cephalic	10
HA	19	C_section	Nuliparous	No	Singleton	C-section before labor	36	Cephalic	10
HB	19	C_section	Nuliparous	No	Singleton	C-section before labor	35	Cephalic	10
HA	45	C_section	Multiparous	Yes	Singleton	Spontaneous labor	36	Cephalic	10
HA	41	C_section	Multiparous	Yes	Singleton	C-section before labor	35	Cephalic	10
HA	35	C_section	Multiparous	Yes	Singleton	Spontaneous labor	36	Cephalic	10
HB	35	C_section	Multiparous	Yes	Singleton	C-section before labor	39	Cephalic	10
HB	35	C_section	Multiparous	Yes	Singleton	C-section before labor	36	Cephalic	10
HA	33	C_section	Multiparous	Yes	Singleton	Spontaneous labor	36	Cephalic	10
HB	32	C_section	Multiparous	Yes	Singleton	Spontaneous labor	36	Cephalic	10
HA	32	C_section	Multiparous	Yes	Singleton	Spontaneous labor	36	Cephalic	10
HB	31	C_section	Multiparous	Yes	Singleton	Spontaneous labor	36	Cephalic	10
HA	31	C_section	Multiparous	Yes	Singleton	Spontaneous labor	35	Cephalic	10
HB	31	C_section	Multiparous	Yes	Singleton	C-section before labor	34	Cephalic	10
HA	30	C_section	Multiparous	Yes	Singleton	C-section before labor	35	Cephalic	10
HA	30	C_section	Multiparous	Yes	Singleton	Spontaneous labor	30	Cephalic	10
HA	28	C_section	Multiparous	Yes	Singleton	Spontaneous labor	36	Cephalic	10
HA	28	C_section	Multiparous	Yes	Singleton	Spontaneous labor	35	Cephalic	10
HA	27	C_section	Multiparous	Yes	Singleton	Spontaneous labor	35	Cephalic	10
HA	26	C_section	Multiparous	Yes	Singleton	C-section before labor	35	Cephalic	10
HA	25	C_section	Multiparous	Yes	Singleton	C-section before labor	34	Cephalic	10
HA	25	C_section	Multiparous	Yes	Singleton	C-section before labor	36	Cephalic	10
HA	22	C_section	Multiparous	Yes	Singleton	Spontaneous labor	36	Cephalic	10
HA	22	C_section	Multiparous	Yes	Singleton	Spontaneous labor	35	Cephalic	10
HB	18	C_section	Multiparous	Yes	Singleton	Spontaneous labor	31	Cephalic	10
HA	17	C_section	Multiparous	Yes	Singleton	Spontaneous labor	36	Cephalic	10
HA	22	C_section	Nuliparous	No	Singleton	C-section before labor	35	Cephalic	10
HA	44	C_section	Multiparous	Yes	Singleton	C-section before labor	34	Cephalic	10
HA	38	C_section	Multiparous	No	Singleton	C-section before labor	36	Cephalic	10
HA	38	C_section	Multiparous	No	Singleton	C-section before labor	35	Cephalic	10
HA	35	C_section	Multiparous	Yes	Singleton	C-section before labor	31	Cephalic	10
HA	34	C_section	Nuliparous	No	Singleton	C-section before labor	36	Cephalic	10
HA	29	C_section	Nuliparous	No	Singleton	C-section before labor	36	Cephalic	10
HA	27	C_section	Nuliparous	No	Singleton	C-section before labor	36	Cephalic	10
HA	26	C_section	Multiparous	Yes	Singleton	C-section before labor	35	Cephalic	10
HA	25	C_section	Multiparous	Yes	Singleton	C-section before labor	36	Cephalic	10
HA	23	C_section	Nuliparous	No	Singleton	Spontaneous labor	35	Cephalic	10
HA	20	C_section	Nuliparous	No	Singleton	C-section before labor	34	Cephalic	10
HA	18	C_section	Nuliparous	No	Singleton	C-section before labor	34	Cephalic	10
HA	35	C_section	Multiparous	No	Singleton	C-section before labor	29	Cephalic	10
HA	40	C_section	Multiparous	No	Singleton	C-section before labor	34	Cephalic	10
HA	30	C_section	Nuliparous	No	Singleton	Induced labor	36	Cephalic	10
HA	28	C_section	Multiparous	Yes	Singleton	C-section before labor	31	Cephalic	10
HA	28	C_section	Multiparous	Yes	Singleton	C-section before labor	33	Cephalic	10
HA	19	C_section	Multiparous	No	Singleton	Induced labor	36	Cephalic	10
HA	20	C_section	Nuliparous	No	Singleton	Spontaneous labor	36	Cephalic	10
HB	20	C_section	Multiparous	Yes	Singleton	Spontaneous labor	37	transverse or oblique	9
HB	24	C_section	Nuliparous	No	Singleton	Induced labor	41	transverse or oblique	9
HA	41	C_section	Nuliparous	No	Singleton	C-section before labor	37	transverse or oblique	9
HA	37	C_section	Multiparous	Yes	Singleton	Induced labor	40	transverse or oblique	9
HB	32	C_section	Multiparous	Yes	Singleton	C-section before labor	26	transverse or oblique	9
HA	29	C_section	Nuliparous	No	Singleton	C-section before labor	40	transverse or oblique	9
HA	24	C_section	Nuliparous	No	Singleton	C-section before labor	41	transverse or oblique	9
HA	22	C_section	Nuliparous	No	Singleton	Spontaneous labor	38	transverse or oblique	9
HA	31	C_section	Multiparous	No	Singleton	Spontaneous labor	35	transverse or oblique	9
HA	33	C_section	Multiparous	No	Singleton	Spontaneous labor	39	transverse or oblique	9
HA	39	C_section	Multiparous	No	Singleton	Spontaneous labor	39	transverse or oblique	9
HA	36	C_section	Multiparous	Yes	Singleton	Spontaneous labor	37	transverse or oblique	9
HA	36	C_section	Multiparous	No	Singleton	Induced labor	38	transverse or oblique	9
HA	36	C_section	Multiparous	No	Singleton	Spontaneous labor	36	transverse or oblique	9
HA	26	C_section	Multiparous	Yes	Singleton	Spontaneous labor	38	transverse or oblique	9
HA	26	C_section	Nuliparous	No	Singleton	C-section before labor	40	transverse or oblique	9
HA	25	C_section	Nuliparous	No	Singleton	Spontaneous labor	41	transverse or oblique	9
HB	25	C_section	Multiparous	Yes	Singleton	C-section before labor	35	transverse or oblique	9
HA	21	C_section	Multiparous	Yes	Singleton	Spontaneous labor	39	transverse or oblique	9
HB	21	C_section	Nuliparous	No	Singleton	C-section before labor	32	transverse or oblique	9
HA	24	C_section	Nuliparous	No	Multiple	Spontaneous labor	31	Cephalic	8
HA	42	C_section	Multiparous	No	Multiple	Spontaneous labor	37	Cephalic	8
HA	41	C_section	Multiparous	Yes	Multiple	Spontaneous labor	37	Cephalic	8
HB	41	C_section	Multiparous	No	Multiple	C-section before labor	37	Breech	8
HA	38	C_section	Nuliparous	No	Multiple	C-section before labor	38	transverse or oblique	8
HA	38	C_section	Multiparous	No	Multiple	Spontaneous labor	34	transverse or oblique	8
HA	37	C_section	Multiparous	No	Multiple	Spontaneous labor	37	transverse or oblique	8
HA	37	C_section	Multiparous	No	Multiple	Spontaneous labor	38	Cephalic	8
HB	37	C_section	Multiparous	Yes	Multiple	Spontaneous labor	36	Cephalic	8
HA	36	C_section	Multiparous	No	Multiple	Spontaneous labor	32	Cephalic	8
HA	36	C_section	Multiparous	No	Multiple	C-section before labor	34	transverse or oblique	8
HB	36	C_section	Multiparous	No	Multiple	Spontaneous labor	35	Breech	8
HB	36	C_section	Multiparous	No	Multiple	Spontaneous labor	34	Breech	8
HB	36	C_section	Nuliparous	No	Multiple	Spontaneous labor	35	Cephalic	8
HA	35	C_section	Nuliparous	No	Multiple	C-section before labor	39	transverse or oblique	8
HB	35	C_section	Multiparous	No	Multiple	Spontaneous labor	36	Cephalic	8
HA	34	C_section	Nuliparous	No	Multiple	Spontaneous labor	35	Cephalic	8
HB	34	C_section	Multiparous	No	Multiple	Spontaneous labor	35	Cephalic	8
HA	33	C_section	Multiparous	No	Multiple	C-section before labor	33	transverse or oblique	8
HA	33	C_section	Multiparous	Yes	Multiple	C-section before labor	35	transverse or oblique	8
HA	33	C_section	Multiparous	Yes	Multiple	Spontaneous labor	34	transverse or oblique	8
HB	33	C_section	Multiparous	No	Multiple	C-section before labor	36	Breech	8
HB	33	C_section	Multiparous	No	Multiple	Spontaneous labor	38	Cephalic	8
HA	32	C_section	Multiparous	Yes	Multiple	C-section before labor	36	Cephalic	8
HA	32	C_section	Multiparous	No	Multiple	Spontaneous labor	32	transverse or oblique	8
HA	32	C_section	Multiparous	Yes	Multiple	Spontaneous labor	36	transverse or oblique	8
HA	31	C_section	Nuliparous	No	Multiple	Spontaneous labor	36	Cephalic	8
HA	31	C_section	Multiparous	No	Multiple	Spontaneous labor	37	transverse or oblique	8
HA	30	C_section	Multiparous	Yes	Multiple	Spontaneous labor	38	transverse or oblique	8
HA	30	C_section	Multiparous	Yes	Multiple	C-section before labor	31	transverse or oblique	8
HB	30	C_section	Multiparous	Yes	Multiple	Spontaneous labor	36	transverse or oblique	8
HA	29	C_section	Multiparous	No	Singleton	Spontaneous labor	41	Cephalic	8
HA	29	C_section	Nuliparous	No	Multiple	Spontaneous labor	26	Breech	8
HA	29	C_section	Multiparous	No	Multiple	Spontaneous labor	38	Breech	8
HA	29	C_section	Nuliparous	No	Multiple	Spontaneous labor	35	Cephalic	8
HA	29	C_section	Nuliparous	No	Multiple	C-section before labor	31	transverse or oblique	8
HA	29	C_section	Nuliparous	No	Multiple	Spontaneous labor	35	transverse or oblique	8
HB	29	C_section	Multiparous	No	Multiple	Spontaneous labor	35	transverse or oblique	8
HA	28	C_section	Nuliparous	No	Multiple	Spontaneous labor	40	Breech	8
HA	28	C_section	Multiparous	No	Multiple	Spontaneous labor	37	Breech	8
HA	28	C_section	Multiparous	Yes	Multiple	Spontaneous labor	37	transverse or oblique	8
HA	28	C_section	Nuliparous	No	Singleton	C-section before labor	28	transverse or oblique	8
HA	27	C_section	Multiparous	No	Multiple	Spontaneous labor	36	Cephalic	8
HA	27	C_section	Nuliparous	No	Multiple	C-section before labor	37	Cephalic	8
HA	27	C_section	Nuliparous	No	Multiple	Spontaneous labor	34	transverse or oblique	8
HB	27	C_section	Multiparous	Yes	Multiple	C-section before labor	37	Cephalic	8
HA	26	C_section	Multiparous	No	Multiple	Spontaneous labor	38	Breech	8
HA	26	C_section	Multiparous	No	Multiple	C-section before labor	34	Breech	8
HA	26	C_section	Multiparous	Yes	Multiple	Spontaneous labor	27	transverse or oblique	8
HA	26	C_section	Nuliparous	No	Multiple	C-section before labor	38	transverse or oblique	8
HA	26	C_section	Multiparous	No	Multiple	Spontaneous labor	37	transverse or oblique	8
HA	26	C_section	Multiparous	No	Multiple	Spontaneous labor	35	transverse or oblique	8
HB	26	C_section	Nuliparous	No	Multiple	Spontaneous labor	37	Breech	8
HB	26	C_section	Multiparous	Yes	Multiple	Spontaneous labor	37	Breech	8
HB	26	C_section	Multiparous	Yes	Multiple	Spontaneous labor	37	Cephalic	8
HB	26	C_section	Nuliparous	No	Multiple	C-section before labor	36	Cephalic	8
HA	25	C_section	Multiparous	No	Multiple	Spontaneous labor	36	Cephalic	8
HA	25	C_section	Multiparous	Yes	Multiple	Spontaneous labor	38	Cephalic	8
HA	25	C_section	Nuliparous	No	Multiple	C-section before labor	31	Cephalic	8
HA	25	C_section	Multiparous	Yes	Multiple	Spontaneous labor	37	transverse or oblique	8
HA	25	C_section	Nuliparous	No	Multiple	Spontaneous labor	30	transverse or oblique	8
HA	25	C_section	Multiparous	No	Multiple	Spontaneous labor	38	transverse or oblique	8
HA	25	C_section	Nuliparous	No	Multiple	Spontaneous labor	36	transverse or oblique	8
HB	25	C_section	Multiparous	No	Multiple	Spontaneous labor	37	transverse or oblique	8
HA	24	C_section	Multiparous	Yes	Multiple	Spontaneous labor	38	Cephalic	8
HA	24	C_section	Multiparous	Yes	Multiple	Spontaneous labor	36	Breech	8
HA	24	C_section	Multiparous	Yes	Multiple	Spontaneous labor	35	Cephalic	8
HA	24	C_section	Multiparous	No	Multiple	Spontaneous labor	35	transverse or oblique	8
HA	24	C_section	Multiparous	Yes	Multiple	Spontaneous labor	36	transverse or oblique	8
HA	24	C_section	Multiparous	Yes	Multiple	Spontaneous labor	36	transverse or oblique	8
HA	23	C_section	Multiparous	No	Singleton	Spontaneous labor	33	Cephalic	8
HB	23	C_section	Multiparous	Yes	Multiple	C-section before labor	37	Cephalic	8
HB	22	C_section	Multiparous	Yes	Multiple	C-section before labor	36	Cephalic	8
HA	22	C_section	Multiparous	No	Multiple	Spontaneous labor	34	transverse or oblique	8
HA	22	C_section	Multiparous	Yes	Multiple	C-section before labor	37	Cephalic	8
HA	22	C_section	Multiparous	Yes	Multiple	C-section before labor	37	Cephalic	8
HA	22	C_section	Nuliparous	No	Multiple	Spontaneous labor	37	transverse or oblique	8
HB	22	C_section	Multiparous	No	Multiple	Spontaneous labor	35	Cephalic	8
HA	21	C_section	Nuliparous	No	Multiple	Spontaneous labor	36	Breech	8
HA	21	C_section	Multiparous	Yes	Multiple	Spontaneous labor	32	transverse or oblique	8
HB	20	C_section	Multiparous	No	Multiple	Spontaneous labor	33	Cephalic	8
HA	17	C_section	Nuliparous	No	Multiple	Spontaneous labor	36	Breech	8
HB	17	C_section	Nuliparous	No	Multiple	Spontaneous labor	35	transverse or oblique	8
HB	17	C_section	Nuliparous	No	Multiple	C-section before labor	35	transverse or oblique	8
HA	16	C_section	Nuliparous	No	Multiple	C-section before labor	35	transverse or oblique	8
HA	15	C_section	Nuliparous	No	Multiple	Spontaneous labor	34	transverse or oblique	8
HA	13	C_section	Nuliparous	No	Multiple	Spontaneous labor	37	transverse or oblique	8
HA	16	C_section	Nuliparous	No	Multiple	Spontaneous labor	29	transverse or oblique	8
HA	38	C_section	Multiparous	No	Multiple	Spontaneous labor	31	Breech	8
HA	24	C_section	Multiparous	No	Singleton	Spontaneous labor	31	Breech	7
HA	33	C_section	Multiparous	No	Singleton	C-section before labor	40	Breech	7
HA	31	C_section	Multiparous	Yes	Singleton	Spontaneous labor	38	Breech	7
HA	41	C_section	Multiparous	No	Singleton	Spontaneous labor	39	Breech	7
HA	40	C_section	Multiparous	No	Singleton	C-section before labor	35	Breech	7
HA	34	C_section	Multiparous	No	Singleton	Spontaneous labor	34	Breech	7
HA	20	C_section	Multiparous	No	Singleton	C-section before labor	33	Breech	7
HA	39	C_section	Multiparous	Yes	Singleton	Spontaneous labor	39	Breech	7
HB	46	C_section	Multiparous	Yes	Singleton	C-section before labor	31	Breech	7
HA	43	C_section	Multiparous	No	Singleton	C-section before labor	29	Breech	7
HA	40	C_section	Multiparous	Yes	Singleton	Spontaneous labor	31	Breech	7
HA	37	C_section	Multiparous	Yes	Singleton	C-section before labor	33	Breech	7
HB	31	C_section	Multiparous	Yes	Singleton	Spontaneous labor	39	Breech	7
HB	30	C_section	Multiparous	No	Singleton	C-section before labor	40	Breech	7
HB	30	C_section	Multiparous	No	Singleton	C-section before labor	38	Breech	7
HB	26	C_section	Multiparous	No	Singleton	Induced labor	41	Breech	7
HB	25	C_section	Multiparous	No	Singleton	Spontaneous labor	44	Breech	7
HA	43	C_section	Multiparous	Yes	Singleton	C-section before labor	40	Breech	7
HA	42	C_section	Multiparous	No	Singleton	C-section before labor	38	Breech	7
HA	41	C_section	Multiparous	No	Singleton	C-section before labor	38	Breech	7
HA	40	C_section	Multiparous	Yes	Singleton	Spontaneous labor	40	Breech	7
HB	40	C_section	Multiparous	No	Singleton	Spontaneous labor	40	Breech	7
HA	39	C_section	Multiparous	No	Singleton	Spontaneous labor	39	Breech	7
HB	39	C_section	Multiparous	No	Singleton	Spontaneous labor	39	Breech	7
HA	39	C_section	Multiparous	Yes	Singleton	Spontaneous labor	41	Breech	7
HA	39	C_section	Multiparous	Yes	Singleton	C-section before labor	30	Breech	7
HA	39	C_section	Multiparous	No	Singleton	Spontaneous labor	36	Breech	7
HA	38	C_section	Multiparous	Yes	Singleton	Spontaneous labor	38	Breech	7
HA	38	C_section	Multiparous	No	Singleton	Spontaneous labor	38	Breech	7
HA	38	C_section	Multiparous	Yes	Singleton	C-section before labor	40	Breech	7
HA	38	C_section	Multiparous	Yes	Singleton	C-section before labor	40	Breech	7
HB	38	C_section	Multiparous	No	Singleton	Spontaneous labor	39	Breech	7
HB	38	C_section	Multiparous	Yes	Singleton	Spontaneous labor	37	Breech	7
HA	38	C_section	Multiparous	No	Singleton	Spontaneous labor	30	Breech	7
HA	38	C_section	Multiparous	No	Singleton	Spontaneous labor	40	Breech	7
HA	37	C_section	Multiparous	No	Singleton	C-section before labor	36	Breech	7
HA	37	C_section	Multiparous	Yes	Singleton	Spontaneous labor	38	Breech	7
HB	37	C_section	Multiparous	No	Singleton	Spontaneous labor	40	Breech	7
HB	37	C_section	Multiparous	No	Singleton	C-section before labor	41	Breech	7
HA	36	C_section	Multiparous	Yes	Singleton	C-section before labor	38	Breech	7
HA	36	C_section	Multiparous	No	Singleton	Spontaneous labor	36	Breech	7
HA	36	C_section	Multiparous	No	Singleton	Spontaneous labor	40	Breech	7
HA	36	C_section	Multiparous	No	Singleton	Spontaneous labor	38	Breech	7
HA	35	C_section	Multiparous	No	Singleton	Spontaneous labor	40	Breech	7
HA	35	C_section	Multiparous	Yes	Singleton	Spontaneous labor	28	Breech	7
HA	34	C_section	Multiparous	No	Singleton	Spontaneous labor	39	Breech	7
HA	34	C_section	Multiparous	No	Singleton	C-section before labor	41	Breech	7
HA	33	C_section	Multiparous	Yes	Singleton	C-section before labor	41	Breech	7
HA	33	C_section	Multiparous	Yes	Singleton	Spontaneous labor	41	Breech	7
HB	33	C_section	Multiparous	Yes	Singleton	Spontaneous labor	37	Breech	7
HB	33	C_section	Multiparous	Yes	Singleton	Spontaneous labor	40	Breech	7
HB	33	C_section	Multiparous	No	Singleton	C-section before labor	41	Breech	7
HB	33	C_section	Multiparous	Yes	Singleton	Spontaneous labor	37	Breech	7
HA	32	C_section	Multiparous	Yes	Singleton	C-section before labor	40	Breech	7
HA	32	C_section	Multiparous	No	Singleton	Spontaneous labor	40	Breech	7
HA	32	C_section	Multiparous	Yes	Singleton	C-section before labor	40	Breech	7
HB	32	C_section	Multiparous	No	Singleton	Spontaneous labor	39	Breech	7
HB	32	C_section	Multiparous	Yes	Singleton	C-section before labor	39	Breech	7
HA	32	C_section	Multiparous	No	Singleton	C-section before labor	41	Breech	7
HA	32	C_section	Multiparous	No	Singleton	C-section before labor	36	Breech	7
HB	32	C_section	Multiparous	No	Singleton	C-section before labor	37	Breech	7
HA	31	C_section	Multiparous	Yes	Singleton	C-section before labor	39	Breech	7
HB	31	C_section	Multiparous	No	Singleton	C-section before labor	41	Breech	7
HA	31	C_section	Multiparous	Yes	Singleton	Spontaneous labor	38	Breech	7
HB	30	C_section	Multiparous	No	Singleton	Spontaneous labor	39	Breech	7
HA	30	C_section	Multiparous	Yes	Singleton	C-section before labor	38	Breech	7
HA	30	C_section	Multiparous	No	Singleton	C-section before labor	38	Breech	7
HA	30	C_section	Multiparous	No	Singleton	C-section before labor	33	Cephalic	7
HA	29	C_section	Multiparous	Yes	Singleton	C-section before labor	39	Breech	7
HA	29	C_section	Multiparous	No	Singleton	Spontaneous labor	36	Breech	7
HB	29	C_section	Multiparous	Yes	Singleton	Spontaneous labor	38	Breech	7
HA	29	C_section	Multiparous	No	Singleton	Spontaneous labor	37	Breech	7
HA	29	C_section	Multiparous	No	Singleton	Spontaneous labor	38	Breech	7
HA	29	C_section	Multiparous	Yes	Singleton	C-section before labor	38	Breech	7
HA	28	C_section	Multiparous	Yes	Singleton	Spontaneous labor	40	Breech	7
HA	28	C_section	Multiparous	No	Singleton	Spontaneous labor	36	Breech	7
HA	28	C_section	Multiparous	No	Singleton	Spontaneous labor	38	Breech	7
HA	28	C_section	Multiparous	Yes	Singleton	Spontaneous labor	38	Breech	7
HA	27	C_section	Multiparous	No	Singleton	C-section before labor	38	Breech	7
HA	27	C_section	Multiparous	No	Singleton	Spontaneous labor	37	Breech	7
HA	26	C_section	Multiparous	Yes	Singleton	Spontaneous labor	35	Breech	7
HA	26	C_section	Multiparous	Yes	Singleton	C-section before labor	38	Breech	7
HA	25	C_section	Multiparous	No	Singleton	Spontaneous labor	39	Breech	7
HA	25	C_section	Multiparous	Yes	Singleton	Spontaneous labor	38	Breech	7
HB	25	C_section	Multiparous	No	Singleton	C-section before labor	41	Breech	7
HA	24	C_section	Multiparous	No	Singleton	Spontaneous labor	41	Breech	7
HB	24	C_section	Multiparous	No	Singleton	Spontaneous labor	36	Breech	7
HB	24	C_section	Multiparous	No	Singleton	Spontaneous labor	39	Breech	7
HB	23	C_section	Multiparous	No	Singleton	Spontaneous labor	39	Breech	7
HA	22	C_section	Multiparous	No	Singleton	C-section before labor	39	Breech	7
HA	22	C_section	Multiparous	No	Singleton	Spontaneous labor	40	Breech	7
HA	22	C_section	Multiparous	No	Singleton	Spontaneous labor	30	Breech	7
HA	21	C_section	Multiparous	No	Singleton	Spontaneous labor	37	Breech	7
HA	20	C_section	Multiparous	No	Singleton	Spontaneous labor	40	Breech	7
HA	19	C_section	Multiparous	Yes	Singleton	C-section before labor	38	Breech	7
HA	17	C_section	Multiparous	Yes	Singleton	Spontaneous labor	36	Breech	7
HA	17	C_section	Multiparous	Yes	Singleton	Spontaneous labor	35	Breech	7
HA	24	C_section	Nuliparous	No	Singleton	C-section before labor	35	Breech	6
HA	21	C_section	Nuliparous	No	Singleton	C-section before labor	32	Breech	6
HA	17	C_section	Nuliparous	No	Singleton	Spontaneous labor	26	Breech	6
HA	16	C_section	Nuliparous	No	Singleton	Induced labor	32	Breech	6
HA	15	C_section	Nuliparous	No	Singleton	Spontaneous labor	26	Breech	6
HA	29	C_section	Nuliparous	No	Singleton	Induced labor	25	Breech	6
HA	37	C_section	Nuliparous	No	Singleton	C-section before labor	31	Breech	6
HA	33	C_section	Nuliparous	No	Singleton	C-section before labor	39	Breech	6
HB	20	C_section	Nuliparous	No	Singleton	Spontaneous labor	39	Breech	6
HA	28	C_section	Nuliparous	No	Singleton	C-section before labor	33	Breech	6
HA	22	C_section	Nuliparous	No	Singleton	C-section before labor	33	Breech	6
HA	42	C_section	Nuliparous	No	Singleton	C-section before labor	30	Breech	6
HB	40	C_section	Nuliparous	No	Singleton	C-section before labor	39	Breech	6
HB	34	C_section	Nuliparous	No	Singleton	Spontaneous labor	38	Breech	6
HB	27	C_section	Nuliparous	No	Singleton	C-section before labor	40	Breech	6
HB	24	C_section	Nuliparous	No	Singleton	Spontaneous labor	37	Breech	6
HB	22	C_section	Nuliparous	No	Singleton	Spontaneous labor	37	Breech	6
HA	42	C_section	Nuliparous	No	Singleton	C-section before labor	37	Breech	6
HA	39	C_section	Nuliparous	No	Singleton	C-section before labor	39	Breech	6
HB	38	C_section	Nuliparous	No	Singleton	C-section before labor	39	Breech	6
HA	36	C_section	Nuliparous	No	Singleton	Spontaneous labor	39	Breech	6
HA	36	C_section	Nuliparous	No	Singleton	C-section before labor	38	Breech	6
HA	34	C_section	Nuliparous	No	Singleton	Spontaneous labor	40	Breech	6
HA	34	C_section	Nuliparous	No	Singleton	C-section before labor	38	Breech	6
HA	33	C_section	Nuliparous	No	Singleton	C-section before labor	34	Breech	6
HA	33	C_section	Nuliparous	No	Singleton	C-section before labor	41	Breech	6
HA	33	C_section	Nuliparous	No	Singleton	Spontaneous labor	40	Breech	6
HB	33	C_section	Nuliparous	No	Singleton	Spontaneous labor	38	Breech	6
HB	33	C_section	Nuliparous	No	Singleton	Spontaneous labor	40	Breech	6
HB	32	C_section	Nuliparous	No	Singleton	Spontaneous labor	38	Breech	6
HB	32	C_section	Nuliparous	No	Singleton	Spontaneous labor	36	Breech	6
HA	32	C_section	Nuliparous	No	Singleton	C-section before labor	38	Breech	6
HA	31	C_section	Nuliparous	No	Singleton	Spontaneous labor	39	Breech	6
HA	31	C_section	Nuliparous	No	Singleton	C-section before labor	38	Breech	6
HA	31	C_section	Nuliparous	No	Singleton	Spontaneous labor	33	Breech	6
HB	31	C_section	Nuliparous	No	Singleton	C-section before labor	40	Breech	6
HA	30	C_section	Nuliparous	No	Singleton	C-section before labor	35	Breech	6
HA	29	C_section	Nuliparous	No	Singleton	Spontaneous labor	39	Breech	6
HA	28	C_section	Nuliparous	No	Singleton	Spontaneous labor	40	Breech	6
HA	28	C_section	Nuliparous	No	Singleton	Spontaneous labor	40	Breech	6
HA	28	C_section	Nuliparous	No	Singleton	C-section before labor	32	Breech	6
HA	28	C_section	Nuliparous	No	Singleton	C-section before labor	38	Breech	6
HA	28	C_section	Nuliparous	No	Singleton	C-section before labor	34	Breech	6
HB	28	C_section	Nuliparous	No	Singleton	C-section before labor	38	Breech	6
HA	27	C_section	Nuliparous	No	Singleton	C-section before labor	40	Breech	6
HA	27	C_section	Nuliparous	No	Singleton	C-section before labor	38	Breech	6
HB	27	C_section	Nuliparous	No	Singleton	Induced labor	38	Breech	6
HB	27	C_section	Nuliparous	No	Singleton	C-section before labor	35	Breech	6
HB	27	C_section	Nuliparous	No	Singleton	Spontaneous labor	38	Breech	6
HA	26	C_section	Nuliparous	No	Singleton	C-section before labor	39	Breech	6
HA	25	C_section	Nuliparous	No	Singleton	Spontaneous labor	39	Breech	6
HA	25	C_section	Nuliparous	No	Singleton	Spontaneous labor	37	Breech	6
HA	25	C_section	Nuliparous	No	Singleton	C-section before labor	39	Breech	6
HA	25	C_section	Nuliparous	No	Singleton	Spontaneous labor	40	Breech	6
HA	25	C_section	Nuliparous	No	Singleton	Spontaneous labor	38	Breech	6
HA	25	C_section	Nuliparous	No	Singleton	Spontaneous labor	38	Breech	6
HA	25	C_section	Nuliparous	No	Singleton	Spontaneous labor	39	Breech	6
HB	24	C_section	Nuliparous	No	Singleton	Spontaneous labor	38	Breech	6
HB	23	C_section	Nuliparous	No	Singleton	C-section before labor	40	Breech	6
HA	23	C_section	Nuliparous	No	Singleton	C-section before labor	34	Breech	6
HA	22	C_section	Nuliparous	No	Singleton	Spontaneous labor	39	Breech	6
HA	22	C_section	Nuliparous	No	Singleton	Spontaneous labor	40	Breech	6
HA	22	C_section	Nuliparous	No	Singleton	Spontaneous labor	39	Breech	6
HA	22	C_section	Nuliparous	No	Singleton	C-section before labor	41	Breech	6
HA	22	C_section	Nuliparous	No	Singleton	Spontaneous labor	38	Breech	6
HA	22	C_section	Nuliparous	No	Singleton	Spontaneous labor	39	Breech	6
HB	22	C_section	Nuliparous	No	Singleton	Spontaneous labor	40	Breech	6
HB	22	C_section	Nuliparous	No	Singleton	C-section before labor	39	Breech	6
HA	22	C_section	Nuliparous	No	Singleton	Spontaneous labor	37	Breech	6
HA	22	C_section	Nuliparous	No	Singleton	C-section before labor	40	Breech	6
HA	22	C_section	Nuliparous	No	Singleton	Spontaneous labor	34	Breech	6
HA	22	C_section	Nuliparous	No	Singleton	Spontaneous labor	39	Breech	6
HA	21	C_section	Nuliparous	No	Singleton	Spontaneous labor	39	Breech	6
HA	21	C_section	Nuliparous	No	Singleton	C-section before labor	40	Breech	6
HB	21	C_section	Nuliparous	No	Singleton	C-section before labor	39	Breech	6
HA	21	C_section	Nuliparous	No	Singleton	Spontaneous labor	40	Breech	6
HA	20	C_section	Nuliparous	No	Singleton	Spontaneous labor	40	Breech	6
HA	20	C_section	Nuliparous	No	Singleton	Spontaneous labor	40	Breech	6
HA	20	C_section	Nuliparous	No	Singleton	Spontaneous labor	40	Breech	6
HA	20	C_section	Nuliparous	No	Singleton	Spontaneous labor	38	Breech	6
HA	20	C_section	Nuliparous	No	Singleton	Spontaneous labor	40	Breech	6
HA	20	C_section	Nuliparous	No	Singleton	Spontaneous labor	40	Breech	6
HA	20	C_section	Nuliparous	No	Singleton	Spontaneous labor	40	Breech	6
HA	20	C_section	Nuliparous	No	Singleton	Spontaneous labor	35	Breech	6
HA	20	C_section	Nuliparous	No	Singleton	C-section before labor	40	Breech	6
HA	20	C_section	Nuliparous	No	Singleton	Spontaneous labor	40	Breech	6
HA	19	C_section	Nuliparous	No	Singleton	C-section before labor	40	Breech	6
HA	19	C_section	Nuliparous	No	Singleton	Spontaneous labor	38	Breech	6
HA	19	C_section	Nuliparous	No	Singleton	Spontaneous labor	39	Breech	6
HA	19	C_section	Nuliparous	No	Singleton	Spontaneous labor	40	Breech	6
HB	19	C_section	Nuliparous	No	Singleton	Spontaneous labor	38	Breech	6
HA	19	C_section	Nuliparous	No	Singleton	C-section before labor	40	Breech	6
HA	19	C_section	Nuliparous	No	Singleton	Spontaneous labor	26	Breech	6
HA	19	C_section	Nuliparous	No	Singleton	Spontaneous labor	31	Breech	6
HA	19	C_section	Nuliparous	No	Singleton	Spontaneous labor	36	Breech	6
HA	18	C_section	Nuliparous	No	Singleton	Spontaneous labor	37	Breech	6
HA	18	C_section	Nuliparous	No	Singleton	Spontaneous labor	38	Breech	6
HA	18	C_section	Nuliparous	No	Singleton	Spontaneous labor	35	Breech	6
HA	17	C_section	Nuliparous	No	Singleton	Spontaneous labor	40	Breech	6
HA	17	C_section	Nuliparous	No	Singleton	Spontaneous labor	40	Breech	6
HB	17	C_section	Nuliparous	No	Singleton	Spontaneous labor	38	Breech	6
HB	17	C_section	Nuliparous	No	Singleton	Spontaneous labor	37	Breech	6
HA	17	C_section	Nuliparous	No	Singleton	Spontaneous labor	38	Breech	6
HA	17	C_section	Nuliparous	No	Singleton	Spontaneous labor	39	Breech	6
HA	17	C_section	Nuliparous	No	Singleton	C-section before labor	40	Breech	6
HA	16	C_section	Nuliparous	No	Singleton	Spontaneous labor	38	Breech	6
HA	16	C_section	Nuliparous	No	Singleton	Spontaneous labor	40	Breech	6
HA	16	C_section	Nuliparous	No	Singleton	C-section before labor	39	Breech	6
HA	16	C_section	Nuliparous	No	Singleton	C-section before labor	35	Breech	6
HB	14	C_section	Nuliparous	No	Singleton	Spontaneous labor	34	Breech	6
HA	13	C_section	Nuliparous	No	Singleton	C-section before labor	38	Breech	6
HA	41	C_section	Multiparous	Yes	Singleton	C-section before labor	38	Cephalic	5
HA	20	C_section	Multiparous	Yes	Singleton	C-section before labor	37	Cephalic	5
HA	31	C_section	Multiparous	Yes	Singleton	Spontaneous labor	40	Cephalic	5
HB	28	C_section	Multiparous	Yes	Singleton	C-section before labor	39	Cephalic	5
HA	37	C_section	Multiparous	Yes	Singleton	Spontaneous labor	38	Cephalic	5
HA	34	C_section	Multiparous	Yes	Singleton	Spontaneous labor	39	Cephalic	5
HA	31	C_section	Multiparous	Yes	Singleton	Spontaneous labor	39	Cephalic	5
HA	30	C_section	Multiparous	Yes	Singleton	C-section before labor	39	Cephalic	5
HA	25	C_section	Multiparous	Yes	Singleton	C-section before labor	42	Cephalic	5
HA	25	C_section	Multiparous	Yes	Singleton	Spontaneous labor	40	Cephalic	5
HA	25	C_section	Multiparous	Yes	Singleton	Spontaneous labor	40	Cephalic	5
HA	23	C_section	Multiparous	Yes	Singleton	Spontaneous labor	37	Cephalic	5
HA	23	C_section	Multiparous	Yes	Singleton	Spontaneous labor	40	Cephalic	5
HA	22	C_section	Multiparous	Yes	Singleton	C-section before labor	40	Cephalic	5
HA	20	C_section	Multiparous	Yes	Singleton	C-section before labor	40	Cephalic	5
HA	18	C_section	Multiparous	Yes	Singleton	Spontaneous labor	39	Cephalic	5
HA	36	C_section	Multiparous	Yes	Singleton	Spontaneous labor	39	Cephalic	5
HA	36	C_section	Multiparous	Yes	Singleton	Spontaneous labor	41	Cephalic	5
HB	35	C_section	Multiparous	Yes	Singleton	Spontaneous labor	40	Cephalic	5
HA	34	C_section	Multiparous	Yes	Singleton	Spontaneous labor	40	Cephalic	5
HB	34	C_section	Multiparous	Yes	Singleton	C-section before labor	39	Cephalic	5
HB	34	C_section	Multiparous	Yes	Singleton	Spontaneous labor	38	Cephalic	5
HA	33	C_section	Multiparous	Yes	Singleton	C-section before labor	41	Cephalic	5
HA	32	C_section	Multiparous	Yes	Singleton	Spontaneous labor	40	Cephalic	5
HA	32	C_section	Multiparous	Yes	Singleton	C-section before labor	38	Cephalic	5
HB	30	C_section	Multiparous	Yes	Singleton	Spontaneous labor	40	Cephalic	5
HB	29	C_section	Multiparous	Yes	Singleton	Spontaneous labor	40	Cephalic	5
HB	28	C_section	Multiparous	Yes	Singleton	Spontaneous labor	39	Cephalic	5
HA	28	C_section	Multiparous	Yes	Singleton	Spontaneous labor	39	Cephalic	5
HA	28	C_section	Multiparous	Yes	Singleton	Spontaneous labor	39	Cephalic	5
HA	27	C_section	Multiparous	Yes	Singleton	Spontaneous labor	41	Cephalic	5
HB	27	C_section	Multiparous	Yes	Singleton	C-section before labor	40	Cephalic	5
HA	26	C_section	Multiparous	Yes	Singleton	Spontaneous labor	39	Cephalic	5
HB	26	C_section	Multiparous	Yes	Singleton	C-section before labor	41	Cephalic	5
HA	25	C_section	Multiparous	Yes	Singleton	C-section before labor	39	Cephalic	5
HA	25	C_section	Multiparous	Yes	Singleton	Spontaneous labor	40	Cephalic	5
HA	25	C_section	Multiparous	Yes	Singleton	Spontaneous labor	38	Cephalic	5
HA	24	C_section	Multiparous	Yes	Singleton	Spontaneous labor	40	Cephalic	5
HA	24	C_section	Multiparous	Yes	Singleton	Spontaneous labor	39	Cephalic	5
HB	23	C_section	Multiparous	Yes	Singleton	Spontaneous labor	40	Cephalic	5
HA	23	C_section	Multiparous	Yes	Singleton	Spontaneous labor	40	Cephalic	5
HA	22	C_section	Multiparous	Yes	Singleton	C-section before labor	40	Cephalic	5
HA	22	C_section	Multiparous	Yes	Singleton	Spontaneous labor	40	Cephalic	5
HA	21	C_section	Multiparous	Yes	Singleton	Spontaneous labor	40	Cephalic	5
HA	18	C_section	Multiparous	Yes	Singleton	Spontaneous labor	39	Cephalic	5
HA	41	C_section	Multiparous	Yes	Singleton	C-section before labor	33	Cephalic	5
HB	40	C_section	Multiparous	Yes	Singleton	C-section before labor	38	Cephalic	5
HA	30	C_section	Multiparous	Yes	Singleton	C-section before labor	38	Cephalic	5
HA	23	C_section	Multiparous	Yes	Singleton	Spontaneous labor	37	Cephalic	5
HB	25	C_section	Multiparous	Yes	Singleton	Spontaneous labor	41	Cephalic	5
HB	31	C_section	Multiparous	Yes	Singleton	Spontaneous labor	42	Cephalic	5
HA	37	C_section	Multiparous	Yes	Singleton	C-section before labor	37	Cephalic	5
HA	27	C_section	Multiparous	Yes	Singleton	C-section before labor	37	Cephalic	5
HA	41	C_section	Multiparous	Yes	Singleton	C-section before labor	39	Cephalic	5
HA	36	C_section	Multiparous	Yes	Singleton	C-section before labor	38	Cephalic	5
HA	23	C_section	Multiparous	Yes	Singleton	C-section before labor	38	Cephalic	5
HA	20	C_section	Multiparous	Yes	Singleton	C-section before labor	37	Cephalic	5
HA	45	C_section	Multiparous	Yes	Singleton	C-section before labor	37	Cephalic	5
HA	45	C_section	Multiparous	Yes	Singleton	C-section before labor	37	Cephalic	5
HB	43	C_section	Multiparous	Yes	Singleton	C-section before labor	37	Cephalic	5
HA	41	C_section	Multiparous	Yes	Singleton	C-section before labor	38	Cephalic	5
HA	38	C_section	Multiparous	Yes	Singleton	C-section before labor	35	Cephalic	5
HA	35	C_section	Multiparous	Yes	Singleton	Spontaneous labor	39	Cephalic	5
HA	35	C_section	Multiparous	Yes	Singleton	C-section before labor	38	Cephalic	5
HA	34	C_section	Multiparous	Yes	Singleton	C-section before labor	38	Cephalic	5
HA	33	C_section	Multiparous	Yes	Singleton	C-section before labor	39	Cephalic	5
HA	32	C_section	Multiparous	Yes	Singleton	C-section before labor	37	Cephalic	5
HA	32	C_section	Multiparous	Yes	Singleton	Spontaneous labor	39	Cephalic	5
HB	30	C_section	Multiparous	Yes	Singleton	C-section before labor	37	Cephalic	5
HA	28	C_section	Multiparous	Yes	Singleton	C-section before labor	39	Cephalic	5
HA	28	C_section	Multiparous	Yes	Singleton	C-section before labor	38	Cephalic	5
HA	26	C_section	Multiparous	Yes	Singleton	C-section before labor	38	Cephalic	5
HA	26	C_section	Multiparous	Yes	Singleton	C-section before labor	40	Cephalic	5
HA	24	C_section	Multiparous	Yes	Singleton	Spontaneous labor	41	Cephalic	5
HA	21	C_section	Multiparous	Yes	Singleton	C-section before labor	38	Cephalic	5
HB	21	C_section	Multiparous	Yes	Singleton	Spontaneous labor	38	Cephalic	5
HB	32	C_section	Multiparous	Yes	Singleton	Spontaneous labor	39	Cephalic	5
HA	41	C_section	Multiparous	Yes	Singleton	Spontaneous labor	38	Cephalic	5
HA	37	C_section	Multiparous	Yes	Singleton	Spontaneous labor	39	Cephalic	5
HA	36	C_section	Multiparous	Yes	Singleton	Spontaneous labor	39	Cephalic	5
HA	36	C_section	Multiparous	Yes	Singleton	Spontaneous labor	39	Cephalic	5
HA	35	C_section	Multiparous	Yes	Singleton	Spontaneous labor	35	Cephalic	5
HA	34	C_section	Multiparous	Yes	Singleton	Spontaneous labor	38	Cephalic	5
HA	33	C_section	Multiparous	Yes	Singleton	Spontaneous labor	38	Cephalic	5
HA	32	C_section	Multiparous	Yes	Singleton	Spontaneous labor	40	Cephalic	5
HB	32	C_section	Multiparous	Yes	Singleton	Spontaneous labor	39	Cephalic	5
HA	32	C_section	Multiparous	Yes	Singleton	Spontaneous labor	37	Cephalic	5
HB	31	C_section	Multiparous	Yes	Singleton	Spontaneous labor	39	Cephalic	5
HB	30	C_section	Multiparous	Yes	Singleton	Spontaneous labor	40	Cephalic	5
HA	29	C_section	Multiparous	Yes	Singleton	Spontaneous labor	38	Cephalic	5
HA	29	C_section	Multiparous	Yes	Singleton	Spontaneous labor	40	Cephalic	5
HA	29	C_section	Multiparous	Yes	Singleton	Spontaneous labor	37	Cephalic	5
HA	28	C_section	Multiparous	Yes	Singleton	Spontaneous labor	39	Cephalic	5
HB	28	C_section	Multiparous	Yes	Singleton	Spontaneous labor	40	Cephalic	5
HA	27	C_section	Multiparous	Yes	Singleton	Spontaneous labor	39	Cephalic	5
HB	27	C_section	Multiparous	Yes	Singleton	Induced labor	39	Cephalic	5
HA	27	C_section	Multiparous	Yes	Singleton	Spontaneous labor	38	Cephalic	5
HB	26	C_section	Multiparous	Yes	Singleton	Induced labor	37	Cephalic	5
HA	26	C_section	Multiparous	Yes	Singleton	Spontaneous labor	38	Cephalic	5
HA	25	C_section	Multiparous	Yes	Singleton	Spontaneous labor	40	Cephalic	5
HA	23	C_section	Multiparous	Yes	Singleton	Spontaneous labor	38	Cephalic	5
HA	23	C_section	Multiparous	Yes	Singleton	Spontaneous labor	40	Cephalic	5
HA	22	C_section	Multiparous	Yes	Singleton	Spontaneous labor	40	Cephalic	5
HA	22	C_section	Multiparous	Yes	Singleton	Spontaneous labor	39	Cephalic	5
HA	22	C_section	Multiparous	Yes	Singleton	Spontaneous labor	40	Cephalic	5
HA	21	C_section	Multiparous	Yes	Singleton	Spontaneous labor	41	Cephalic	5
HB	21	C_section	Multiparous	Yes	Singleton	Spontaneous labor	38	Cephalic	5
HB	20	C_section	Multiparous	Yes	Singleton	Spontaneous labor	37	Cephalic	5
HA	17	C_section	Multiparous	Yes	Singleton	Spontaneous labor	38	Cephalic	5
HA	39	C_section	Multiparous	Yes	Singleton	C-section before labor	39	Cephalic	5
HA	37	C_section	Multiparous	Yes	Singleton	C-section before labor	39	Cephalic	5
HA	34	C_section	Multiparous	Yes	Singleton	C-section before labor	40	Cephalic	5
HA	33	C_section	Multiparous	Yes	Singleton	C-section before labor	37	Cephalic	5
HA	32	C_section	Multiparous	Yes	Singleton	C-section before labor	39	Cephalic	5
HA	30	C_section	Multiparous	Yes	Singleton	Spontaneous labor	40	Cephalic	5
HA	29	C_section	Multiparous	Yes	Singleton	C-section before labor	39	Cephalic	5
HA	24	C_section	Multiparous	Yes	Singleton	Spontaneous labor	33	Cephalic	5
HA	24	C_section	Multiparous	Yes	Singleton	C-section before labor	38	Cephalic	5
HB	23	C_section	Multiparous	Yes	Singleton	C-section before labor	40	Cephalic	5
HA	22	C_section	Multiparous	Yes	Singleton	C-section before labor	38	Cephalic	5
HA	21	C_section	Multiparous	Yes	Singleton	C-section before labor	39	Cephalic	5
HA	37	C_section	Multiparous	Yes	Singleton	C-section before labor	40	Cephalic	5
HB	34	C_section	Multiparous	Yes	Singleton	Spontaneous labor	40	Cephalic	5
HA	33	C_section	Multiparous	Yes	Singleton	C-section before labor	40	Cephalic	5
HB	33	C_section	Multiparous	Yes	Singleton	C-section before labor	38	Cephalic	5
HB	27	C_section	Multiparous	Yes	Singleton	Spontaneous labor	40	Cephalic	5
HA	25	C_section	Multiparous	Yes	Singleton	Spontaneous labor	41	Cephalic	5
HA	30	C_section	Multiparous	Yes	Singleton	C-section before labor	39	Cephalic	5
HA	22	C_section	Multiparous	Yes	Singleton	C-section before labor	39	Cephalic	5
HB	29	C_section	Multiparous	Yes	Singleton	C-section before labor	37	Cephalic	5
HA	47	C_section	Multiparous	Yes	Singleton	C-section before labor	39	Cephalic	5
HA	38	C_section	Multiparous	Yes	Singleton	C-section before labor	39	Cephalic	5
HB	32	C_section	Multiparous	Yes	Singleton	C-section before labor	39	Cephalic	5
HA	31	C_section	Multiparous	Yes	Singleton	C-section before labor	40	Cephalic	5
HA	21	C_section	Multiparous	Yes	Singleton	C-section before labor	39	Cephalic	5
HA	41	C_section	Multiparous	Yes	Singleton	Spontaneous labor	40	Cephalic	5
HA	40	C_section	Multiparous	Yes	Singleton	Spontaneous labor	38	Cephalic	5
HA	38	C_section	Multiparous	Yes	Singleton	C-section before labor	38	Cephalic	5
HA	37	C_section	Multiparous	Yes	Singleton	C-section before labor	39	Cephalic	5
HA	37	C_section	Multiparous	Yes	Singleton	Spontaneous labor	38	Cephalic	5
HA	36	C_section	Multiparous	Yes	Singleton	C-section before labor	41	Cephalic	5
HB	35	C_section	Multiparous	Yes	Singleton	C-section before labor	40	Cephalic	5
HB	35	C_section	Multiparous	Yes	Singleton	Spontaneous labor	40	Cephalic	5
HA	35	C_section	Multiparous	Yes	Singleton	C-section before labor	37	Cephalic	5
HA	34	C_section	Multiparous	Yes	Singleton	C-section before labor	40	Cephalic	5
HA	34	C_section	Multiparous	Yes	Singleton	C-section before labor	39	Cephalic	5
HB	34	C_section	Multiparous	Yes	Singleton	C-section before labor	40	Cephalic	5
HB	33	C_section	Multiparous	Yes	Singleton	C-section before labor	39	Cephalic	5
HA	33	C_section	Multiparous	Yes	Singleton	C-section before labor	40	Cephalic	5
HA	32	C_section	Multiparous	Yes	Singleton	Spontaneous labor	40	Cephalic	5
HB	32	C_section	Multiparous	Yes	Singleton	C-section before labor	40	Cephalic	5
HB	32	C_section	Multiparous	Yes	Singleton	C-section before labor	40	Cephalic	5
HA	30	C_section	Multiparous	Yes	Singleton	Spontaneous labor	39	Cephalic	5
HA	30	C_section	Multiparous	Yes	Singleton	C-section before labor	40	Cephalic	5
HA	30	C_section	Multiparous	Yes	Singleton	Spontaneous labor	40	Cephalic	5
HB	30	C_section	Multiparous	Yes	Singleton	C-section before labor	37	Cephalic	5
HA	29	C_section	Multiparous	Yes	Singleton	C-section before labor	39	Cephalic	5
HA	27	C_section	Multiparous	Yes	Singleton	Spontaneous labor	40	Cephalic	5
HA	26	C_section	Multiparous	Yes	Singleton	C-section before labor	39	Cephalic	5
HA	26	C_section	Multiparous	Yes	Singleton	C-section before labor	39	Cephalic	5
HA	26	C_section	Multiparous	Yes	Singleton	C-section before labor	40	Cephalic	5
HA	25	C_section	Multiparous	Yes	Singleton	C-section before labor	40	Cephalic	5
HB	25	C_section	Multiparous	Yes	Singleton	Spontaneous labor	41	Cephalic	5
HA	25	C_section	Multiparous	Yes	Singleton	Spontaneous labor	38	Cephalic	5
HA	25	C_section	Multiparous	Yes	Singleton	C-section before labor	37	Cephalic	5
HA	23	C_section	Multiparous	Yes	Singleton	C-section before labor	40	Cephalic	5
HA	22	C_section	Multiparous	Yes	Singleton	Spontaneous labor	41	Cephalic	5
HA	22	C_section	Multiparous	Yes	Singleton	Spontaneous labor	39	Cephalic	5
HA	45	C_section	Multiparous	Yes	Singleton	C-section before labor	40	Cephalic	5
HA	44	C_section	Multiparous	Yes	Singleton	Spontaneous labor	40	Cephalic	5
HB	43	C_section	Multiparous	Yes	Singleton	C-section before labor	38	Cephalic	5
HA	43	C_section	Multiparous	Yes	Singleton	Spontaneous labor	39	Cephalic	5
HB	43	C_section	Multiparous	Yes	Singleton	C-section before labor	39	Cephalic	5
HB	42	C_section	Multiparous	Yes	Singleton	C-section before labor	40	Cephalic	5
HA	42	C_section	Multiparous	Yes	Singleton	C-section before labor	37	Cephalic	5
HA	42	C_section	Multiparous	Yes	Singleton	C-section before labor	38	Cephalic	5
HB	42	C_section	Multiparous	No	Singleton	Spontaneous labor	40	Cephalic	5
HB	42	C_section	Multiparous	Yes	Singleton	C-section before labor	39	Cephalic	5
HB	41	C_section	Multiparous	Yes	Singleton	Spontaneous labor	41	Cephalic	5
HA	40	C_section	Multiparous	Yes	Singleton	C-section before labor	38	Cephalic	5
HA	40	C_section	Multiparous	Yes	Singleton	Spontaneous labor	39	Cephalic	5
HB	40	C_section	Multiparous	Yes	Singleton	Spontaneous labor	38	Cephalic	5
HB	40	C_section	Multiparous	Yes	Singleton	C-section before labor	39	Cephalic	5
HB	40	C_section	Multiparous	Yes	Singleton	C-section before labor	38	Cephalic	5
HA	39	C_section	Multiparous	Yes	Singleton	C-section before labor	40	Cephalic	5
HA	39	C_section	Multiparous	Yes	Singleton	C-section before labor	40	Cephalic	5
HA	39	C_section	Multiparous	Yes	Singleton	Spontaneous labor	38	Cephalic	5
HB	39	C_section	Multiparous	Yes	Singleton	Spontaneous labor	39	Cephalic	5
HB	39	C_section	Multiparous	Yes	Singleton	C-section before labor	37	Cephalic	5
HA	39	C_section	Multiparous	Yes	Singleton	C-section before labor	37	Cephalic	5
HB	39	C_section	Multiparous	Yes	Singleton	C-section before labor	37	Cephalic	5
HB	38	C_section	Multiparous	Yes	Singleton	Spontaneous labor	39	Cephalic	5
HB	38	C_section	Multiparous	Yes	Singleton	C-section before labor	39	Cephalic	5
HB	38	C_section	Multiparous	Yes	Singleton	Spontaneous labor	39	Cephalic	5
HB	38	C_section	Multiparous	Yes	Singleton	Spontaneous labor	40	Cephalic	5
HA	38	C_section	Multiparous	Yes	Singleton	Spontaneous labor	39	Cephalic	5
HA	38	C_section	Multiparous	Yes	Singleton	Spontaneous labor	38	Cephalic	5
HA	38	C_section	Multiparous	Yes	Singleton	C-section before labor	37	Cephalic	5
HA	37	C_section	Multiparous	Yes	Singleton	C-section before labor	38	Cephalic	5
HA	37	C_section	Multiparous	Yes	Singleton	Spontaneous labor	38	Cephalic	5
HA	37	C_section	Multiparous	Yes	Singleton	Spontaneous labor	41	Cephalic	5
HA	37	C_section	Multiparous	Yes	Singleton	C-section before labor	40	Cephalic	5
HB	37	C_section	Multiparous	Yes	Singleton	C-section before labor	41	Cephalic	5
HB	37	C_section	Multiparous	Yes	Singleton	Spontaneous labor	41	Cephalic	5
HB	37	C_section	Multiparous	Yes	Singleton	Spontaneous labor	39	Cephalic	5
HB	37	C_section	Multiparous	Yes	Singleton	Spontaneous labor	39	Cephalic	5
HA	37	C_section	Multiparous	Yes	Singleton	Spontaneous labor	39	Cephalic	5
HA	37	C_section	Multiparous	Yes	Singleton	C-section before labor	38	Cephalic	5
HA	36	C_section	Multiparous	Yes	Singleton	Spontaneous labor	40	Cephalic	5
HA	36	C_section	Multiparous	Yes	Singleton	Spontaneous labor	38	Cephalic	5
HA	36	C_section	Multiparous	Yes	Singleton	Spontaneous labor	38	Cephalic	5
HA	36	C_section	Multiparous	Yes	Singleton	Spontaneous labor	39	Cephalic	5
HA	36	C_section	Multiparous	Yes	Singleton	Spontaneous labor	38	Cephalic	5
HB	36	C_section	Multiparous	Yes	Singleton	C-section before labor	41	Cephalic	5
HB	36	C_section	Multiparous	Yes	Singleton	Spontaneous labor	39	Cephalic	5
HA	36	C_section	Multiparous	Yes	Singleton	Spontaneous labor	39	Cephalic	5
HA	36	C_section	Multiparous	Yes	Singleton	C-section before labor	38	Cephalic	5
HA	36	C_section	Multiparous	Yes	Singleton	C-section before labor	38	Cephalic	5
HA	36	C_section	Multiparous	Yes	Singleton	C-section before labor	40	Cephalic	5
HB	36	C_section	Multiparous	Yes	Singleton	C-section before labor	39	Cephalic	5
HA	35	C_section	Multiparous	Yes	Singleton	Spontaneous labor	39	Cephalic	5
HA	35	C_section	Multiparous	Yes	Singleton	Spontaneous labor	40	Cephalic	5
HA	35	C_section	Multiparous	Yes	Singleton	C-section before labor	40	Cephalic	5
HA	35	C_section	Multiparous	Yes	Singleton	Spontaneous labor	40	Cephalic	5
HB	35	C_section	Multiparous	Yes	Singleton	C-section before labor	39	Cephalic	5
HB	35	C_section	Multiparous	Yes	Singleton	Spontaneous labor	39	Cephalic	5
HB	35	C_section	Multiparous	Yes	Singleton	Spontaneous labor	41	Cephalic	5
HB	35	C_section	Multiparous	Yes	Singleton	Spontaneous labor	38	Cephalic	5
HB	35	C_section	Multiparous	Yes	Singleton	C-section before labor	39	Cephalic	5
HB	35	C_section	Multiparous	Yes	Singleton	C-section before labor	41	Cephalic	5
HB	35	C_section	Multiparous	Yes	Singleton	Spontaneous labor	40	Cephalic	5
HB	35	C_section	Multiparous	Yes	Singleton	C-section before labor	38	Cephalic	5
HA	35	C_section	Multiparous	Yes	Singleton	C-section before labor	39	Cephalic	5
HB	35	C_section	Multiparous	Yes	Singleton	C-section before labor	40	Cephalic	5
HB	35	C_section	Multiparous	Yes	Singleton	Spontaneous labor	40	Cephalic	5
HA	34	C_section	Multiparous	Yes	Singleton	Spontaneous labor	40	Cephalic	5
HA	34	C_section	Multiparous	Yes	Singleton	Spontaneous labor	40	Cephalic	5
HA	34	C_section	Multiparous	Yes	Singleton	Spontaneous labor	40	Cephalic	5
HA	34	C_section	Multiparous	Yes	Singleton	Spontaneous labor	38	Cephalic	5
HA	34	C_section	Multiparous	Yes	Singleton	C-section before labor	39	Cephalic	5
HB	34	C_section	Multiparous	Yes	Singleton	C-section before labor	41	Cephalic	5
HB	34	C_section	Multiparous	Yes	Singleton	Spontaneous labor	39	Cephalic	5
HB	34	C_section	Multiparous	Yes	Singleton	C-section before labor	41	Cephalic	5
HB	34	C_section	Multiparous	Yes	Singleton	Spontaneous labor	38	Cephalic	5
HB	34	C_section	Multiparous	Yes	Singleton	Spontaneous labor	39	Cephalic	5
HB	34	C_section	Multiparous	Yes	Singleton	C-section before labor	37	Cephalic	5
HA	34	C_section	Multiparous	Yes	Singleton	C-section before labor	39	Cephalic	5
HB	34	C_section	Multiparous	Yes	Singleton	Spontaneous labor	39	Cephalic	5
HB	34	C_section	Multiparous	Yes	Singleton	Spontaneous labor	41	Cephalic	5
HB	34	C_section	Multiparous	Yes	Singleton	C-section before labor	39	Cephalic	5
HA	33	C_section	Multiparous	Yes	Singleton	Spontaneous labor	38	Cephalic	5
HA	33	C_section	Multiparous	Yes	Singleton	Spontaneous labor	38	Cephalic	5
HA	33	C_section	Multiparous	Yes	Singleton	Spontaneous labor	39	Cephalic	5
HA	33	C_section	Multiparous	Yes	Singleton	Spontaneous labor	40	Cephalic	5
HA	33	C_section	Multiparous	Yes	Singleton	C-section before labor	40	Cephalic	5
HA	33	C_section	Multiparous	Yes	Singleton	Spontaneous labor	39	Cephalic	5
HA	33	C_section	Multiparous	Yes	Singleton	Spontaneous labor	37	Cephalic	5
HA	33	C_section	Multiparous	Yes	Singleton	C-section before labor	38	Cephalic	5
HA	33	C_section	Multiparous	Yes	Singleton	Spontaneous labor	40	Cephalic	5
HA	33	C_section	Multiparous	Yes	Singleton	Spontaneous labor	39	Cephalic	5
HA	33	C_section	Multiparous	Yes	Singleton	C-section before labor	39	Cephalic	5
HB	33	C_section	Multiparous	Yes	Singleton	Spontaneous labor	40	Cephalic	5
HA	33	C_section	Multiparous	Yes	Singleton	C-section before labor	38	Cephalic	5
HA	32	C_section	Multiparous	Yes	Singleton	C-section before labor	40	Cephalic	5
HA	32	C_section	Multiparous	Yes	Singleton	Spontaneous labor	39	Cephalic	5
HA	32	C_section	Multiparous	Yes	Singleton	C-section before labor	40	Cephalic	5
HA	32	C_section	Multiparous	Yes	Singleton	Spontaneous labor	37	Cephalic	5
HA	32	C_section	Multiparous	Yes	Singleton	Spontaneous labor	40	Cephalic	5
HB	32	C_section	Multiparous	Yes	Singleton	C-section before labor	39	Cephalic	5
HB	32	C_section	Multiparous	Yes	Singleton	C-section before labor	41	Cephalic	5
HB	32	C_section	Multiparous	Yes	Singleton	C-section before labor	39	Cephalic	5
HB	32	C_section	Multiparous	Yes	Singleton	Spontaneous labor	37	Cephalic	5
HB	32	C_section	Multiparous	Yes	Singleton	C-section before labor	40	Cephalic	5
HB	32	C_section	Multiparous	Yes	Singleton	Spontaneous labor	38	Cephalic	5
HB	32	C_section	Multiparous	Yes	Singleton	C-section before labor	41	Cephalic	5
HA	32	C_section	Multiparous	Yes	Singleton	Spontaneous labor	40	Cephalic	5
HB	32	C_section	Multiparous	Yes	Singleton	C-section before labor	38	Cephalic	5
HA	31	C_section	Multiparous	Yes	Singleton	Spontaneous labor	38	Cephalic	5
HA	31	C_section	Multiparous	Yes	Singleton	Spontaneous labor	39	Cephalic	5
HA	31	C_section	Multiparous	Yes	Singleton	Spontaneous labor	38	Cephalic	5
HB	31	C_section	Multiparous	Yes	Singleton	C-section before labor	38	Cephalic	5
HB	31	C_section	Multiparous	Yes	Singleton	Spontaneous labor	39	Cephalic	5
HB	31	C_section	Multiparous	Yes	Singleton	C-section before labor	38	Cephalic	5
HB	31	C_section	Multiparous	Yes	Singleton	C-section before labor	38	Cephalic	5
HB	31	C_section	Multiparous	Yes	Singleton	C-section before labor	39	Cephalic	5
HA	31	C_section	Multiparous	Yes	Singleton	Spontaneous labor	40	Cephalic	5
HA	31	C_section	Multiparous	Yes	Singleton	Spontaneous labor	40	Cephalic	5
HA	31	C_section	Multiparous	Yes	Singleton	C-section before labor	37	Cephalic	5
HA	31	C_section	Multiparous	Yes	Singleton	Spontaneous labor	39	Cephalic	5
HA	31	C_section	Multiparous	Yes	Singleton	Spontaneous labor	38	Cephalic	5
HB	31	C_section	Multiparous	Yes	Singleton	Spontaneous labor	38	Cephalic	5
HA	30	C_section	Multiparous	Yes	Singleton	C-section before labor	38	Cephalic	5
HA	30	C_section	Multiparous	Yes	Singleton	C-section before labor	39	Cephalic	5
HA	30	C_section	Multiparous	Yes	Singleton	Spontaneous labor	37	Cephalic	5
HA	30	C_section	Multiparous	Yes	Singleton	C-section before labor	40	Cephalic	5
HB	30	C_section	Multiparous	Yes	Singleton	Spontaneous labor	37	Cephalic	5
HB	30	C_section	Multiparous	Yes	Singleton	Spontaneous labor	37	Cephalic	5
HA	30	C_section	Multiparous	Yes	Singleton	C-section before labor	39	Cephalic	5
HA	30	C_section	Multiparous	Yes	Singleton	C-section before labor	40	Cephalic	5
HA	30	C_section	Multiparous	Yes	Singleton	C-section before labor	37	Cephalic	5
HA	30	C_section	Multiparous	Yes	Singleton	C-section before labor	38	Cephalic	5
HA	30	C_section	Multiparous	Yes	Singleton	C-section before labor	38	Cephalic	5
HA	30	C_section	Multiparous	Yes	Singleton	C-section before labor	39	Cephalic	5
HB	30	C_section	Multiparous	Yes	Singleton	C-section before labor	38	Cephalic	5
HB	30	C_section	Multiparous	Yes	Singleton	C-section before labor	37	Cephalic	5
HB	30	C_section	Multiparous	Yes	Singleton	Spontaneous labor	39	Cephalic	5
HB	30	C_section	Multiparous	Yes	Singleton	C-section before labor	42	Cephalic	5
HB	30	C_section	Multiparous	Yes	Singleton	C-section before labor	38	Cephalic	5
HA	29	C_section	Multiparous	Yes	Singleton	Spontaneous labor	39	Cephalic	5
HA	29	C_section	Multiparous	Yes	Singleton	Spontaneous labor	38	Cephalic	5
HA	29	C_section	Multiparous	Yes	Singleton	Spontaneous labor	38	Cephalic	5
HA	29	C_section	Multiparous	Yes	Singleton	Spontaneous labor	41	Cephalic	5
HA	29	C_section	Multiparous	Yes	Singleton	Spontaneous labor	40	Cephalic	5
HA	29	C_section	Multiparous	Yes	Singleton	C-section before labor	38	Cephalic	5
HB	29	C_section	Multiparous	Yes	Singleton	C-section before labor	39	Cephalic	5
HB	29	C_section	Multiparous	Yes	Singleton	Spontaneous labor	38	Cephalic	5
HB	29	C_section	Multiparous	Yes	Singleton	Spontaneous labor	37	Cephalic	5
HB	29	C_section	Multiparous	Yes	Singleton	Spontaneous labor	39	Cephalic	5
HB	29	C_section	Multiparous	Yes	Singleton	Spontaneous labor	39	Cephalic	5
HB	29	C_section	Multiparous	Yes	Singleton	Spontaneous labor	40	Cephalic	5
HB	29	C_section	Multiparous	Yes	Singleton	C-section before labor	41	Cephalic	5
HB	29	C_section	Multiparous	Yes	Singleton	C-section before labor	38	Cephalic	5
HA	29	C_section	Multiparous	Yes	Singleton	Spontaneous labor	40	Cephalic	5
HB	29	C_section	Multiparous	Yes	Singleton	C-section before labor	38	Cephalic	5
HB	29	C_section	Multiparous	Yes	Singleton	C-section before labor	39	Cephalic	5
HA	28	C_section	Multiparous	Yes	Singleton	Spontaneous labor	38	Cephalic	5
HA	28	C_section	Multiparous	Yes	Singleton	Spontaneous labor	38	Cephalic	5
HA	28	C_section	Multiparous	Yes	Singleton	Spontaneous labor	39	Cephalic	5
HB	28	C_section	Multiparous	Yes	Singleton	Spontaneous labor	38	Cephalic	5
HB	28	C_section	Multiparous	Yes	Singleton	C-section before labor	38	Cephalic	5
HB	28	C_section	Multiparous	Yes	Singleton	C-section before labor	38	Cephalic	5
HB	28	C_section	Multiparous	Yes	Singleton	C-section before labor	41	Cephalic	5
HB	28	C_section	Multiparous	Yes	Singleton	Spontaneous labor	39	Cephalic	5
HB	28	C_section	Multiparous	Yes	Singleton	C-section before labor	39	Cephalic	5
HA	28	C_section	Multiparous	Yes	Singleton	C-section before labor	40	Cephalic	5
HB	28	C_section	Multiparous	Yes	Singleton	Spontaneous labor	39	Cephalic	5
HB	28	C_section	Multiparous	Yes	Singleton	C-section before labor	39	Cephalic	5
HA	27	C_section	Multiparous	Yes	Singleton	Spontaneous labor	38	Cephalic	5
HA	27	C_section	Multiparous	Yes	Singleton	Spontaneous labor	41	Cephalic	5
HA	27	C_section	Multiparous	Yes	Singleton	C-section before labor	40	Cephalic	5
HA	27	C_section	Multiparous	Yes	Singleton	Spontaneous labor	39	Cephalic	5
HA	27	C_section	Multiparous	Yes	Singleton	Spontaneous labor	39	Cephalic	5
HB	27	C_section	Multiparous	Yes	Singleton	C-section before labor	39	Cephalic	5
HB	27	C_section	Multiparous	Yes	Singleton	C-section before labor	38	Cephalic	5
HB	27	C_section	Multiparous	Yes	Singleton	C-section before labor	37	Cephalic	5
HB	27	C_section	Multiparous	Yes	Singleton	Spontaneous labor	39	Cephalic	5
HB	27	C_section	Multiparous	Yes	Singleton	C-section before labor	38	Cephalic	5
HB	27	C_section	Multiparous	Yes	Singleton	Spontaneous labor	38	Cephalic	5
HB	27	C_section	Multiparous	Yes	Singleton	C-section before labor	39	Cephalic	5
HA	27	C_section	Multiparous	Yes	Singleton	C-section before labor	37	Cephalic	5
HA	27	C_section	Multiparous	Yes	Singleton	C-section before labor	42	Cephalic	5
HA	26	C_section	Multiparous	Yes	Singleton	Spontaneous labor	37	Cephalic	5
HA	26	C_section	Multiparous	Yes	Singleton	Spontaneous labor	40	Cephalic	5
HA	26	C_section	Multiparous	Yes	Singleton	Spontaneous labor	37	Cephalic	5
HA	26	C_section	Multiparous	Yes	Singleton	Spontaneous labor	39	Cephalic	5
HA	26	C_section	Multiparous	Yes	Singleton	C-section before labor	38	Cephalic	5
HB	26	C_section	Multiparous	Yes	Singleton	Spontaneous labor	39	Cephalic	5
HB	26	C_section	Multiparous	Yes	Singleton	Spontaneous labor	39	Cephalic	5
HB	26	C_section	Multiparous	Yes	Singleton	C-section before labor	37	Cephalic	5
HB	26	C_section	Multiparous	Yes	Singleton	Spontaneous labor	39	Cephalic	5
HA	25	C_section	Multiparous	Yes	Singleton	Spontaneous labor	39	Cephalic	5
HA	25	C_section	Multiparous	Yes	Singleton	C-section before labor	41	Cephalic	5
HA	25	C_section	Multiparous	Yes	Singleton	Spontaneous labor	39	Cephalic	5
HA	25	C_section	Multiparous	Yes	Singleton	C-section before labor	41	Cephalic	5
HA	25	C_section	Multiparous	Yes	Singleton	Spontaneous labor	40	Cephalic	5
HA	25	C_section	Multiparous	Yes	Singleton	Spontaneous labor	39	Cephalic	5
HA	25	C_section	Multiparous	Yes	Singleton	Spontaneous labor	39	Cephalic	5
HA	25	C_section	Multiparous	Yes	Singleton	C-section before labor	38	Cephalic	5
HB	25	C_section	Multiparous	Yes	Singleton	Spontaneous labor	39	Cephalic	5
HB	25	C_section	Multiparous	Yes	Singleton	C-section before labor	38	Cephalic	5
HA	25	C_section	Multiparous	Yes	Singleton	C-section before labor	37	Cephalic	5
HA	24	C_section	Multiparous	Yes	Singleton	C-section before labor	39	Cephalic	5
HA	24	C_section	Multiparous	Yes	Singleton	C-section before labor	40	Cephalic	5
HB	24	C_section	Multiparous	Yes	Singleton	Spontaneous labor	41	Cephalic	5
HA	24	C_section	Multiparous	Yes	Singleton	C-section before labor	42	Cephalic	5
HA	24	C_section	Multiparous	Yes	Singleton	Spontaneous labor	40	Cephalic	5
HA	24	C_section	Multiparous	Yes	Singleton	C-section before labor	41	Cephalic	5
HA	23	C_section	Multiparous	Yes	Singleton	Spontaneous labor	38	Cephalic	5
HA	23	C_section	Multiparous	Yes	Singleton	C-section before labor	40	Cephalic	5
HA	23	C_section	Multiparous	Yes	Singleton	Spontaneous labor	40	Cephalic	5
HA	23	C_section	Multiparous	Yes	Singleton	Spontaneous labor	40	Cephalic	5
HA	23	C_section	Multiparous	Yes	Singleton	Spontaneous labor	40	Cephalic	5
HB	23	C_section	Multiparous	Yes	Singleton	Spontaneous labor	39	Cephalic	5
HB	23	C_section	Multiparous	Yes	Singleton	C-section before labor	40	Cephalic	5
HB	23	C_section	Multiparous	Yes	Singleton	Spontaneous labor	38	Cephalic	5
HB	23	C_section	Multiparous	Yes	Singleton	Spontaneous labor	38	Cephalic	5
HB	23	C_section	Multiparous	Yes	Singleton	C-section before labor	41	Cephalic	5
HA	23	C_section	Multiparous	Yes	Singleton	Spontaneous labor	37	Cephalic	5
HA	23	C_section	Multiparous	Yes	Singleton	Spontaneous labor	32	Cephalic	5
HA	23	C_section	Multiparous	Yes	Singleton	C-section before labor	39	Cephalic	5
HB	23	C_section	Multiparous	Yes	Singleton	C-section before labor	41	Cephalic	5
HB	23	C_section	Multiparous	Yes	Singleton	C-section before labor	39	Cephalic	5
HA	22	C_section	Multiparous	Yes	Singleton	Spontaneous labor	37	Cephalic	5
HB	22	C_section	Multiparous	Yes	Singleton	C-section before labor	41	Cephalic	5
HB	22	C_section	Multiparous	Yes	Singleton	Spontaneous labor	41	Cephalic	5
HB	22	C_section	Multiparous	Yes	Singleton	C-section before labor	40	Cephalic	5
HB	22	C_section	Multiparous	Yes	Singleton	C-section before labor	42	Cephalic	5
HA	22	C_section	Multiparous	Yes	Singleton	C-section before labor	41	Cephalic	5
HB	22	C_section	Multiparous	Yes	Singleton	C-section before labor	39	Cephalic	5
HA	21	C_section	Multiparous	Yes	Singleton	Spontaneous labor	39	Cephalic	5
HA	21	C_section	Multiparous	Yes	Singleton	Spontaneous labor	41	Cephalic	5
HB	21	C_section	Multiparous	Yes	Singleton	Spontaneous labor	38	Cephalic	5
HA	20	C_section	Multiparous	Yes	Singleton	Spontaneous labor	41	Cephalic	5
HB	20	C_section	Multiparous	Yes	Singleton	Spontaneous labor	40	Cephalic	5
HB	20	C_section	Multiparous	Yes	Singleton	Spontaneous labor	39	Cephalic	5
HA	20	C_section	Multiparous	Yes	Singleton	Spontaneous labor	39	Cephalic	5
HB	19	C_section	Multiparous	Yes	Singleton	Spontaneous labor	39	Cephalic	5
HB	19	C_section	Multiparous	Yes	Singleton	Spontaneous labor	40	Cephalic	5
HA	18	C_section	Multiparous	Yes	Singleton	Spontaneous labor	39	Cephalic	5
HA	42	C_section	Multiparous	Yes	Singleton	Spontaneous labor	39	Cephalic	5
HB	38	C_section	Multiparous	Yes	Singleton	C-section before labor	42	Cephalic	5
HA	33	C_section	Multiparous	Yes	Singleton	Spontaneous labor	39	Cephalic	5
HB	25	C_section	Multiparous	Yes	Singleton	C-section before labor	37	Cephalic	5
HA	36	C_section	Multiparous	Yes	Singleton	C-section before labor	38	Cephalic	5
HA	32	C_section	Multiparous	Yes	Singleton	C-section before labor	38	Cephalic	5
HA	30	C_section	Multiparous	Yes	Singleton	Spontaneous labor	39	Cephalic	5
HA	28	C_section	Multiparous	Yes	Singleton	Spontaneous labor	37	Cephalic	5
HA	28	C_section	Multiparous	Yes	Singleton	Spontaneous labor	37	Cephalic	5
HA	27	C_section	Multiparous	Yes	Singleton	Spontaneous labor	40	Cephalic	5
HA	26	C_section	Multiparous	Yes	Singleton	C-section before labor	38	Cephalic	5
HA	26	C_section	Multiparous	Yes	Singleton	C-section before labor	39	Cephalic	5
HA	26	C_section	Multiparous	Yes	Singleton	C-section before labor	37	Cephalic	5
HA	35	C_section	Multiparous	Yes	Singleton	C-section before labor	38	Cephalic	5
HB	43	C_section	Multiparous	Yes	Singleton	C-section before labor	38	Cephalic	5
HB	38	C_section	Multiparous	Yes	Singleton	C-section before labor	36	Cephalic	5
HB	34	C_section	Multiparous	Yes	Singleton	C-section before labor	37	Cephalic	5
HA	33	C_section	Multiparous	Yes	Singleton	C-section before labor	40	Cephalic	5
HA	33	C_section	Multiparous	Yes	Singleton	Spontaneous labor	40	Cephalic	5
HA	33	C_section	Multiparous	Yes	Singleton	C-section before labor	38	Cephalic	5
HA	32	C_section	Multiparous	Yes	Singleton	C-section before labor	38	Cephalic	5
HA	30	C_section	Multiparous	Yes	Singleton	C-section before labor	38	Cephalic	5
HA	30	C_section	Multiparous	Yes	Singleton	C-section before labor	39	Cephalic	5
HB	26	C_section	Multiparous	Yes	Singleton	C-section before labor	37	Cephalic	5
HA	25	C_section	Multiparous	Yes	Singleton	Spontaneous labor	38	Cephalic	5
HA	22	C_section	Multiparous	Yes	Singleton	C-section before labor	40	Cephalic	5
HA	45	C_section	Multiparous	Yes	Singleton	C-section before labor	38	Cephalic	5
HA	42	C_section	Multiparous	Yes	Singleton	C-section before labor	38	Cephalic	5
HA	38	C_section	Multiparous	Yes	Singleton	C-section before labor	38	Cephalic	5
HA	38	C_section	Multiparous	Yes	Singleton	C-section before labor	37	Cephalic	5
HA	38	C_section	Multiparous	Yes	Singleton	C-section before labor	38	Cephalic	5
HA	37	C_section	Multiparous	Yes	Singleton	C-section before labor	39	Cephalic	5
HA	36	C_section	Multiparous	Yes	Singleton	C-section before labor	37	Cephalic	5
HA	34	C_section	Multiparous	Yes	Singleton	C-section before labor	38	Cephalic	5
HB	34	C_section	Multiparous	Yes	Singleton	Spontaneous labor	37	Cephalic	5
HB	33	C_section	Multiparous	Yes	Singleton	C-section before labor	39	Cephalic	5
HA	30	C_section	Multiparous	Yes	Singleton	Spontaneous labor	38	Cephalic	5
HA	29	C_section	Multiparous	Yes	Singleton	C-section before labor	40	Cephalic	5
HA	28	C_section	Multiparous	Yes	Singleton	C-section before labor	37	Cephalic	5
HA	40	C_section	Multiparous	Yes	Singleton	Induced labor	39	Cephalic	5
HB	32	C_section	Multiparous	Yes	Singleton	Induced labor	39	Cephalic	5
HB	30	C_section	Multiparous	Yes	Singleton	Spontaneous labor	39	Cephalic	5
HA	27	C_section	Multiparous	Yes	Singleton	Induced labor	37	Cephalic	5
HA	26	C_section	Multiparous	Yes	Singleton	C-section before labor	40	Cephalic	5
HA	33	C_section	Multiparous	Yes	Singleton	Spontaneous labor	38	Cephalic	5
HA	39	C_section	Multiparous	Yes	Singleton	Spontaneous labor	40	Cephalic	5
HA	38	C_section	Multiparous	Yes	Singleton	Spontaneous labor	38	Cephalic	5
HA	31	C_section	Multiparous	Yes	Singleton	C-section before labor	38	Cephalic	5
HB	28	C_section	Multiparous	Yes	Singleton	Spontaneous labor	40	Cephalic	5
HA	26	C_section	Multiparous	Yes	Singleton	C-section before labor	39	Cephalic	5
HA	23	C_section	Multiparous	Yes	Singleton	C-section before labor	31	Cephalic	5
HA	40	C_section	Multiparous	Yes	Singleton	C-section before labor	39	Cephalic	5
HA	38	C_section	Multiparous	Yes	Singleton	C-section before labor	39	Cephalic	5
HB	34	C_section	Multiparous	Yes	Singleton	C-section before labor	38	Cephalic	5
HB	31	C_section	Multiparous	Yes	Singleton	C-section before labor	38	Cephalic	5
HA	26	C_section	Multiparous	Yes	Singleton	C-section before labor	39	Cephalic	5
HA	41	C_section	Multiparous	Yes	Singleton	C-section before labor	38	Cephalic	5
HA	44	C_section	Multiparous	Yes	Singleton	Spontaneous labor	41	Cephalic	5
HA	42	C_section	Multiparous	Yes	Singleton	Spontaneous labor	38	Cephalic	5
HA	41	C_section	Multiparous	Yes	Singleton	Spontaneous labor	40	Cephalic	5
HB	41	C_section	Multiparous	Yes	Singleton	Spontaneous labor	39	Cephalic	5
HB	40	C_section	Multiparous	Yes	Singleton	Spontaneous labor	39	Cephalic	5
HB	39	C_section	Multiparous	Yes	Singleton	C-section before labor	37	Cephalic	5
HA	38	C_section	Multiparous	Yes	Singleton	C-section before labor	41	Cephalic	5
HA	38	C_section	Multiparous	Yes	Singleton	Spontaneous labor	40	Cephalic	5
HB	37	C_section	Multiparous	Yes	Singleton	Spontaneous labor	39	Cephalic	5
HA	36	C_section	Multiparous	Yes	Singleton	Spontaneous labor	40	Cephalic	5
HA	36	C_section	Multiparous	Yes	Singleton	Spontaneous labor	40	Cephalic	5
HA	36	C_section	Multiparous	Yes	Singleton	Spontaneous labor	40	Cephalic	5
HA	36	C_section	Multiparous	Yes	Singleton	Spontaneous labor	40	Cephalic	5
HA	36	C_section	Multiparous	Yes	Singleton	Spontaneous labor	39	Cephalic	5
HB	36	C_section	Multiparous	Yes	Singleton	Spontaneous labor	39	Cephalic	5
HA	35	C_section	Multiparous	Yes	Singleton	Spontaneous labor	40	Cephalic	5
HA	34	C_section	Multiparous	Yes	Singleton	C-section before labor	40	Cephalic	5
HA	34	C_section	Multiparous	Yes	Singleton	Spontaneous labor	40	Cephalic	5
HA	34	C_section	Multiparous	Yes	Singleton	Spontaneous labor	39	Cephalic	5
HB	34	C_section	Multiparous	Yes	Singleton	Spontaneous labor	39	Cephalic	5
HA	33	C_section	Multiparous	Yes	Singleton	Spontaneous labor	40	Cephalic	5
HA	33	C_section	Multiparous	Yes	Singleton	Spontaneous labor	40	Cephalic	5
HA	33	C_section	Multiparous	Yes	Singleton	Spontaneous labor	39	Cephalic	5
HB	33	C_section	Multiparous	Yes	Singleton	Spontaneous labor	38	Cephalic	5
HB	33	C_section	Multiparous	Yes	Singleton	C-section before labor	39	Cephalic	5
HA	32	C_section	Multiparous	Yes	Singleton	C-section before labor	38	Cephalic	5
HA	32	C_section	Multiparous	Yes	Singleton	Spontaneous labor	39	Cephalic	5
HA	32	C_section	Multiparous	Yes	Singleton	Spontaneous labor	40	Cephalic	5
HA	32	C_section	Multiparous	Yes	Singleton	Spontaneous labor	37	Cephalic	5
HA	32	C_section	Multiparous	Yes	Singleton	Spontaneous labor	40	Cephalic	5
HA	32	C_section	Multiparous	Yes	Singleton	Spontaneous labor	41	Cephalic	5
HB	32	C_section	Multiparous	Yes	Singleton	Spontaneous labor	39	Cephalic	5
HA	31	C_section	Multiparous	Yes	Singleton	C-section before labor	41	Cephalic	5
HA	31	C_section	Multiparous	Yes	Singleton	Spontaneous labor	40	Cephalic	5
HB	31	C_section	Multiparous	Yes	Singleton	Spontaneous labor	41	Cephalic	5
HA	31	C_section	Multiparous	Yes	Singleton	Spontaneous labor	37	Cephalic	5
HA	31	C_section	Multiparous	Yes	Singleton	Spontaneous labor	40	Cephalic	5
HA	30	C_section	Multiparous	Yes	Singleton	Spontaneous labor	39	Cephalic	5
HA	30	C_section	Multiparous	Yes	Singleton	Spontaneous labor	39	Cephalic	5
HA	30	C_section	Multiparous	Yes	Singleton	Spontaneous labor	39	Cephalic	5
HA	30	C_section	Multiparous	Yes	Singleton	Spontaneous labor	40	Cephalic	5
HB	30	C_section	Multiparous	Yes	Singleton	Spontaneous labor	38	Cephalic	5
HB	30	C_section	Multiparous	Yes	Singleton	Spontaneous labor	38	Cephalic	5
HB	30	C_section	Multiparous	Yes	Singleton	Spontaneous labor	39	Cephalic	5
HA	30	C_section	Multiparous	Yes	Singleton	Spontaneous labor	40	Cephalic	5
HA	29	C_section	Multiparous	Yes	Singleton	Spontaneous labor	39	Cephalic	5
HA	29	C_section	Multiparous	Yes	Singleton	Spontaneous labor	38	Cephalic	5
HA	29	C_section	Multiparous	Yes	Singleton	Spontaneous labor	40	Cephalic	5
HA	29	C_section	Multiparous	Yes	Singleton	Spontaneous labor	38	Cephalic	5
HB	29	C_section	Multiparous	Yes	Singleton	Spontaneous labor	38	Cephalic	5
HB	29	C_section	Multiparous	Yes	Singleton	C-section before labor	40	Cephalic	5
HB	29	C_section	Multiparous	Yes	Singleton	Spontaneous labor	40	Cephalic	5
HB	29	C_section	Multiparous	Yes	Singleton	C-section before labor	39	Cephalic	5
HA	29	C_section	Multiparous	Yes	Singleton	Spontaneous labor	40	Cephalic	5
HA	28	C_section	Multiparous	Yes	Singleton	Spontaneous labor	40	Cephalic	5
HA	28	C_section	Multiparous	Yes	Singleton	C-section before labor	38	Cephalic	5
HA	28	C_section	Multiparous	Yes	Singleton	Spontaneous labor	38	Cephalic	5
HA	28	C_section	Multiparous	Yes	Singleton	Spontaneous labor	39	Cephalic	5
HA	28	C_section	Multiparous	Yes	Singleton	Spontaneous labor	40	Cephalic	5
HB	28	C_section	Multiparous	Yes	Singleton	Spontaneous labor	41	Cephalic	5
HA	28	C_section	Multiparous	Yes	Singleton	Spontaneous labor	40	Cephalic	5
HA	27	C_section	Multiparous	Yes	Singleton	C-section before labor	40	Cephalic	5
HA	27	C_section	Multiparous	Yes	Singleton	Spontaneous labor	40	Cephalic	5
HA	27	C_section	Multiparous	Yes	Singleton	Spontaneous labor	37	Cephalic	5
HA	27	C_section	Multiparous	Yes	Singleton	Spontaneous labor	41	Cephalic	5
HA	27	C_section	Multiparous	Yes	Singleton	Spontaneous labor	41	Cephalic	5
HA	27	C_section	Multiparous	Yes	Singleton	C-section before labor	40	Cephalic	5
HB	27	C_section	Multiparous	Yes	Singleton	Spontaneous labor	40	Cephalic	5
HA	26	C_section	Multiparous	Yes	Singleton	Spontaneous labor	38	Cephalic	5
HA	26	C_section	Multiparous	Yes	Singleton	Spontaneous labor	40	Cephalic	5
HB	26	C_section	Multiparous	Yes	Singleton	Spontaneous labor	39	Cephalic	5
HA	26	C_section	Multiparous	Yes	Singleton	Spontaneous labor	40	Cephalic	5
HA	26	C_section	Multiparous	Yes	Singleton	Spontaneous labor	40	Cephalic	5
HA	25	C_section	Multiparous	Yes	Singleton	Spontaneous labor	40	Cephalic	5
HB	25	C_section	Multiparous	Yes	Singleton	Spontaneous labor	40	Cephalic	5
HB	25	C_section	Multiparous	Yes	Singleton	C-section before labor	38	Cephalic	5
HA	25	C_section	Multiparous	Yes	Singleton	Spontaneous labor	39	Cephalic	5
HA	24	C_section	Multiparous	Yes	Singleton	Spontaneous labor	37	Cephalic	5
HA	24	C_section	Multiparous	Yes	Singleton	Spontaneous labor	39	Cephalic	5
HA	24	C_section	Multiparous	Yes	Singleton	Spontaneous labor	39	Cephalic	5
HA	24	C_section	Multiparous	Yes	Singleton	Spontaneous labor	40	Cephalic	5
HA	24	C_section	Multiparous	Yes	Singleton	Spontaneous labor	39	Cephalic	5
HA	24	C_section	Multiparous	Yes	Singleton	Spontaneous labor	39	Cephalic	5
HA	24	C_section	Multiparous	Yes	Singleton	Spontaneous labor	39	Cephalic	5
HA	24	C_section	Multiparous	Yes	Singleton	Spontaneous labor	40	Cephalic	5
HB	24	C_section	Multiparous	Yes	Singleton	Spontaneous labor	38	Cephalic	5
HB	24	C_section	Multiparous	Yes	Singleton	Spontaneous labor	40	Cephalic	5
HB	24	C_section	Multiparous	Yes	Singleton	Spontaneous labor	39	Cephalic	5
HA	23	C_section	Multiparous	Yes	Singleton	Spontaneous labor	39	Cephalic	5
HA	23	C_section	Multiparous	Yes	Singleton	Spontaneous labor	41	Cephalic	5
HA	23	C_section	Multiparous	Yes	Singleton	C-section before labor	39	Cephalic	5
HA	23	C_section	Multiparous	Yes	Singleton	Spontaneous labor	39	Cephalic	5
HA	23	C_section	Multiparous	Yes	Singleton	Spontaneous labor	39	Cephalic	5
HA	23	C_section	Multiparous	Yes	Singleton	Spontaneous labor	40	Cephalic	5
HA	23	C_section	Multiparous	Yes	Singleton	C-section before labor	41	Cephalic	5
HA	23	C_section	Multiparous	Yes	Singleton	Spontaneous labor	39	Cephalic	5
HA	23	C_section	Multiparous	Yes	Singleton	Spontaneous labor	40	Cephalic	5
HA	22	C_section	Multiparous	Yes	Singleton	Spontaneous labor	40	Cephalic	5
HA	22	C_section	Multiparous	Yes	Singleton	Spontaneous labor	41	Cephalic	5
HA	22	C_section	Multiparous	Yes	Singleton	Spontaneous labor	41	Cephalic	5
HA	22	C_section	Multiparous	Yes	Singleton	Spontaneous labor	40	Cephalic	5
HA	22	C_section	Multiparous	Yes	Singleton	Spontaneous labor	37	Cephalic	5
HA	21	C_section	Multiparous	Yes	Singleton	C-section before labor	39	Cephalic	5
HB	21	C_section	Multiparous	Yes	Singleton	Spontaneous labor	39	Cephalic	5
HB	21	C_section	Multiparous	Yes	Singleton	Spontaneous labor	39	Cephalic	5
HA	20	C_section	Multiparous	Yes	Singleton	Spontaneous labor	41	Cephalic	5
HA	19	C_section	Multiparous	Yes	Singleton	C-section before labor	40	Cephalic	5
HA	18	C_section	Multiparous	Yes	Singleton	Spontaneous labor	39	Cephalic	5
HA	17	C_section	Multiparous	Yes	Singleton	C-section before labor	40	Cephalic	5
HA	16	C_section	Multiparous	Yes	Singleton	Spontaneous labor	37	Cephalic	5
HA	16	C_section	Multiparous	Yes	Singleton	C-section before labor	41	Cephalic	5
HA	27	C_section	Multiparous	Yes	Singleton	C-section before labor	41	Cephalic	5
HA	47	C_section	Multiparous	Yes	Singleton	C-section before labor	38	Cephalic	5
HA	47	C_section	Multiparous	Yes	Singleton	C-section before labor	38	Cephalic	5
HA	43	C_section	Multiparous	Yes	Singleton	Spontaneous labor	39	Cephalic	5
HB	34	C_section	Multiparous	No	Singleton	C-section before labor	38	Cephalic	5
HB	33	C_section	Multiparous	Yes	Singleton	C-section before labor	37	Cephalic	5
HA	30	C_section	Multiparous	Yes	Singleton	C-section before labor	39	Cephalic	5
HA	29	C_section	Multiparous	Yes	Singleton	C-section before labor	37	Cephalic	5
HA	29	C_section	Multiparous	Yes	Singleton	C-section before labor	38	Cephalic	5
HA	27	C_section	Multiparous	Yes	Singleton	C-section before labor	40	Cephalic	5
HA	26	C_section	Multiparous	Yes	Singleton	C-section before labor	37	Cephalic	5
HA	26	C_section	Multiparous	Yes	Singleton	C-section before labor	38	Cephalic	5
HA	21	C_section	Multiparous	Yes	Singleton	C-section before labor	39	Cephalic	5
HA	20	C_section	Multiparous	Yes	Singleton	C-section before labor	38	Cephalic	5
HA	19	C_section	Multiparous	Yes	Singleton	Spontaneous labor	39	Cephalic	5
HA	36	C_section	Multiparous	Yes	Singleton	C-section before labor	39	Cephalic	5
HB	26	C_section	Multiparous	Yes	Singleton	C-section before labor	39	Cephalic	5
HA	45	C_section	Multiparous	Yes	Singleton	C-section before labor	40	Cephalic	5
HA	45	C_section	Multiparous	Yes	Singleton	C-section before labor	38	Cephalic	5
HB	45	C_section	Multiparous	Yes	Singleton	C-section before labor	38	Cephalic	5
HA	44	C_section	Multiparous	Yes	Singleton	C-section before labor	40	Cephalic	5
HA	43	C_section	Multiparous	Yes	Singleton	Spontaneous labor	38	Cephalic	5
HA	43	C_section	Multiparous	Yes	Singleton	C-section before labor	38	Cephalic	5
HA	43	C_section	Multiparous	Yes	Singleton	Spontaneous labor	39	Cephalic	5
HA	43	C_section	Multiparous	Yes	Singleton	C-section before labor	39	Cephalic	5
HA	42	C_section	Multiparous	Yes	Singleton	C-section before labor	40	Cephalic	5
HA	42	C_section	Multiparous	Yes	Singleton	C-section before labor	41	Cephalic	5
HB	42	C_section	Multiparous	Yes	Singleton	C-section before labor	41	Cephalic	5
HA	41	C_section	Multiparous	Yes	Singleton	Spontaneous labor	38	Cephalic	5
HA	41	C_section	Multiparous	Yes	Singleton	C-section before labor	42	Cephalic	5
HA	41	C_section	Multiparous	Yes	Singleton	Spontaneous labor	39	Cephalic	5
HA	41	C_section	Multiparous	Yes	Singleton	Spontaneous labor	39	Cephalic	5
HA	41	C_section	Multiparous	Yes	Singleton	C-section before labor	40	Cephalic	5
HB	41	C_section	Multiparous	Yes	Singleton	C-section before labor	38	Cephalic	5
HA	40	C_section	Multiparous	Yes	Singleton	Spontaneous labor	38	Cephalic	5
HA	40	C_section	Multiparous	Yes	Singleton	Spontaneous labor	40	Cephalic	5
HA	40	C_section	Multiparous	Yes	Singleton	Spontaneous labor	40	Cephalic	5
HB	40	C_section	Multiparous	Yes	Singleton	C-section before labor	41	Cephalic	5
HB	40	C_section	Multiparous	Yes	Singleton	Spontaneous labor	40	Cephalic	5
HB	40	C_section	Multiparous	Yes	Singleton	C-section before labor	37	Cephalic	5
HA	40	C_section	Multiparous	Yes	Singleton	Spontaneous labor	40	Cephalic	5
HA	40	C_section	Multiparous	Yes	Singleton	C-section before labor	38	Cephalic	5
HA	40	C_section	Multiparous	Yes	Singleton	Spontaneous labor	38	Cephalic	5
HA	40	C_section	Multiparous	Yes	Singleton	C-section before labor	39	Cephalic	5
HB	40	C_section	Multiparous	Yes	Singleton	C-section before labor	40	Cephalic	5
HA	39	C_section	Multiparous	Yes	Singleton	C-section before labor	37	Cephalic	5
HA	39	C_section	Multiparous	Yes	Singleton	Spontaneous labor	38	Cephalic	5
HA	39	C_section	Multiparous	Yes	Singleton	C-section before labor	38	Cephalic	5
HB	39	C_section	Multiparous	Yes	Singleton	C-section before labor	41	Cephalic	5
HA	39	C_section	Multiparous	Yes	Singleton	C-section before labor	39	Cephalic	5
HA	39	C_section	Multiparous	Yes	Singleton	C-section before labor	38	Cephalic	5
HA	38	C_section	Multiparous	Yes	Singleton	Spontaneous labor	37	Cephalic	5
HA	38	C_section	Multiparous	Yes	Singleton	Spontaneous labor	40	Cephalic	5
HA	38	C_section	Multiparous	Yes	Singleton	Spontaneous labor	42	Cephalic	5
HA	38	C_section	Multiparous	Yes	Singleton	Spontaneous labor	40	Cephalic	5
HA	38	C_section	Multiparous	Yes	Singleton	Spontaneous labor	37	Cephalic	5
HB	38	C_section	Multiparous	Yes	Singleton	Spontaneous labor	38	Cephalic	5
HB	38	C_section	Multiparous	Yes	Singleton	Spontaneous labor	40	Cephalic	5
HA	38	C_section	Multiparous	Yes	Singleton	Spontaneous labor	38	Cephalic	5
HB	38	C_section	Multiparous	Yes	Singleton	C-section before labor	38	Cephalic	5
HA	37	C_section	Multiparous	Yes	Singleton	Spontaneous labor	40	Cephalic	5
HA	37	C_section	Multiparous	Yes	Singleton	C-section before labor	40	Cephalic	5
HA	37	C_section	Multiparous	Yes	Singleton	Spontaneous labor	40	Cephalic	5
HA	37	C_section	Multiparous	Yes	Singleton	C-section before labor	40	Cephalic	5
HB	37	C_section	Multiparous	Yes	Singleton	Spontaneous labor	41	Cephalic	5
HA	37	C_section	Multiparous	Yes	Singleton	C-section before labor	40	Cephalic	5
HA	37	C_section	Multiparous	Yes	Singleton	C-section before labor	37	Cephalic	5
HA	37	C_section	Multiparous	Yes	Singleton	Spontaneous labor	36	Cephalic	5
HA	37	C_section	Multiparous	Yes	Singleton	C-section before labor	37	Cephalic	5
HA	36	C_section	Multiparous	Yes	Singleton	Spontaneous labor	41	Cephalic	5
HA	36	C_section	Multiparous	Yes	Singleton	Spontaneous labor	38	Cephalic	5
HA	36	C_section	Multiparous	Yes	Singleton	Spontaneous labor	40	Cephalic	5
HB	36	C_section	Multiparous	Yes	Singleton	C-section before labor	38	Cephalic	5
HB	36	C_section	Multiparous	Yes	Singleton	C-section before labor	41	Cephalic	5
HB	36	C_section	Multiparous	Yes	Singleton	C-section before labor	39	Cephalic	5
HB	36	C_section	Multiparous	Yes	Singleton	Induced labor	41	Cephalic	5
HB	36	C_section	Multiparous	Yes	Singleton	C-section before labor	40	Cephalic	5
HB	36	C_section	Multiparous	Yes	Singleton	C-section before labor	40	Cephalic	5
HA	36	C_section	Multiparous	Yes	Singleton	Spontaneous labor	38	Cephalic	5
HA	36	C_section	Multiparous	Yes	Singleton	C-section before labor	39	Cephalic	5
HA	36	C_section	Multiparous	Yes	Singleton	C-section before labor	38	Cephalic	5
HB	36	C_section	Multiparous	Yes	Singleton	Spontaneous labor	40	Cephalic	5
HB	36	C_section	Multiparous	Yes	Singleton	C-section before labor	40	Cephalic	5
HA	36	C_section	Multiparous	Yes	Singleton	C-section before labor	39	Cephalic	5
HA	35	C_section	Multiparous	Yes	Singleton	Spontaneous labor	38	Cephalic	5
HA	35	C_section	Multiparous	Yes	Singleton	Spontaneous labor	40	Cephalic	5
HA	35	C_section	Multiparous	Yes	Singleton	Spontaneous labor	40	Cephalic	5
HA	35	C_section	Multiparous	Yes	Singleton	C-section before labor	40	Cephalic	5
HA	35	C_section	Multiparous	Yes	Singleton	Spontaneous labor	41	Cephalic	5
HA	35	C_section	Multiparous	Yes	Singleton	C-section before labor	40	Cephalic	5
HA	35	C_section	Multiparous	Yes	Singleton	C-section before labor	39	Cephalic	5
HA	35	C_section	Multiparous	Yes	Singleton	Spontaneous labor	40	Cephalic	5
HA	35	C_section	Multiparous	Yes	Singleton	Spontaneous labor	37	Cephalic	5
HA	35	C_section	Multiparous	Yes	Singleton	Spontaneous labor	38	Cephalic	5
HA	35	C_section	Multiparous	Yes	Singleton	Spontaneous labor	40	Cephalic	5
HA	35	C_section	Multiparous	Yes	Singleton	Spontaneous labor	40	Cephalic	5
HB	35	C_section	Multiparous	Yes	Singleton	Spontaneous labor	37	Cephalic	5
HB	35	C_section	Multiparous	Yes	Singleton	Spontaneous labor	39	Cephalic	5
HB	35	C_section	Multiparous	Yes	Singleton	C-section before labor	41	Cephalic	5
HB	35	C_section	Multiparous	Yes	Singleton	C-section before labor	39	Cephalic	5
HA	35	C_section	Multiparous	Yes	Singleton	C-section before labor	41	Cephalic	5
HA	35	C_section	Multiparous	Yes	Singleton	C-section before labor	40	Cephalic	5
HA	35	C_section	Multiparous	Yes	Singleton	C-section before labor	42	Cephalic	5
HB	35	C_section	Multiparous	Yes	Singleton	C-section before labor	39	Cephalic	5
HA	34	C_section	Multiparous	Yes	Singleton	Spontaneous labor	39	Cephalic	5
HA	34	C_section	Multiparous	Yes	Singleton	C-section before labor	41	Cephalic	5
HA	34	C_section	Multiparous	Yes	Singleton	Spontaneous labor	40	Cephalic	5
HA	34	C_section	Multiparous	Yes	Singleton	C-section before labor	39	Cephalic	5
HA	34	C_section	Multiparous	Yes	Singleton	Spontaneous labor	41	Cephalic	5
HA	34	C_section	Multiparous	Yes	Singleton	C-section before labor	40	Cephalic	5
HA	34	C_section	Multiparous	Yes	Singleton	Spontaneous labor	40	Cephalic	5
HA	34	C_section	Multiparous	Yes	Singleton	Spontaneous labor	38	Cephalic	5
HB	34	C_section	Multiparous	Yes	Singleton	C-section before labor	39	Cephalic	5
HB	34	C_section	Multiparous	Yes	Singleton	C-section before labor	40	Cephalic	5
HA	34	C_section	Multiparous	Yes	Singleton	Spontaneous labor	37	Cephalic	5
HA	34	C_section	Multiparous	Yes	Singleton	C-section before labor	38	Cephalic	5
HA	34	C_section	Multiparous	Yes	Singleton	C-section before labor	40	Cephalic	5
HA	34	C_section	Multiparous	Yes	Singleton	Spontaneous labor	40	Cephalic	5
HA	34	C_section	Multiparous	Yes	Singleton	Spontaneous labor	38	Cephalic	5
HA	34	C_section	Multiparous	Yes	Singleton	Spontaneous labor	39	Cephalic	5
HA	34	C_section	Multiparous	Yes	Singleton	Spontaneous labor	42	Cephalic	5
HB	34	C_section	Multiparous	Yes	Singleton	C-section before labor	38	Cephalic	5
HA	33	C_section	Multiparous	Yes	Singleton	Spontaneous labor	39	Cephalic	5
HA	33	C_section	Multiparous	Yes	Singleton	C-section before labor	39	Cephalic	5
HA	33	C_section	Multiparous	Yes	Singleton	C-section before labor	38	Cephalic	5
HA	33	C_section	Multiparous	Yes	Singleton	C-section before labor	40	Cephalic	5
HA	33	C_section	Multiparous	Yes	Singleton	C-section before labor	37	Cephalic	5
HA	33	C_section	Multiparous	Yes	Singleton	Spontaneous labor	40	Cephalic	5
HA	33	C_section	Multiparous	Yes	Singleton	Spontaneous labor	39	Cephalic	5
HA	33	C_section	Multiparous	Yes	Singleton	C-section before labor	39	Cephalic	5
HA	33	C_section	Multiparous	Yes	Singleton	C-section before labor	39	Cephalic	5
HA	33	C_section	Multiparous	Yes	Singleton	Spontaneous labor	39	Cephalic	5
HA	33	C_section	Multiparous	Yes	Singleton	Spontaneous labor	41	Cephalic	5
HA	33	C_section	Multiparous	Yes	Singleton	C-section before labor	40	Cephalic	5
HA	33	C_section	Multiparous	Yes	Singleton	Spontaneous labor	38	Cephalic	5
HA	33	C_section	Multiparous	Yes	Singleton	C-section before labor	40	Cephalic	5
HA	33	C_section	Multiparous	Yes	Singleton	C-section before labor	39	Cephalic	5
HA	33	C_section	Multiparous	Yes	Singleton	Spontaneous labor	39	Cephalic	5
HA	33	C_section	Multiparous	Yes	Singleton	Spontaneous labor	38	Cephalic	5
HB	33	C_section	Multiparous	Yes	Singleton	C-section before labor	39	Cephalic	5
HB	33	C_section	Multiparous	Yes	Singleton	Spontaneous labor	40	Cephalic	5
HA	33	C_section	Multiparous	Yes	Singleton	Spontaneous labor	37	Cephalic	5
HA	33	C_section	Multiparous	Yes	Singleton	C-section before labor	40	Cephalic	5
HA	33	C_section	Multiparous	Yes	Singleton	C-section before labor	39	Cephalic	5
HA	33	C_section	Multiparous	Yes	Singleton	C-section before labor	39	Cephalic	5
HA	33	C_section	Multiparous	Yes	Singleton	C-section before labor	38	Cephalic	5
HA	33	C_section	Multiparous	Yes	Singleton	C-section before labor	41	Cephalic	5
HB	33	C_section	Multiparous	Yes	Singleton	C-section before labor	38	Cephalic	5
HB	33	C_section	Multiparous	Yes	Singleton	C-section before labor	38	Cephalic	5
HA	32	C_section	Multiparous	Yes	Singleton	Spontaneous labor	38	Cephalic	5
HA	32	C_section	Multiparous	Yes	Singleton	Spontaneous labor	39	Cephalic	5
HA	32	C_section	Multiparous	Yes	Singleton	C-section before labor	38	Cephalic	5
HA	32	C_section	Multiparous	Yes	Singleton	Spontaneous labor	40	Cephalic	5
HA	32	C_section	Multiparous	Yes	Singleton	Spontaneous labor	41	Cephalic	5
HA	32	C_section	Multiparous	Yes	Singleton	Spontaneous labor	38	Cephalic	5
HA	32	C_section	Multiparous	Yes	Singleton	Spontaneous labor	38	Cephalic	5
HA	32	C_section	Multiparous	Yes	Singleton	Spontaneous labor	39	Cephalic	5
HA	32	C_section	Multiparous	Yes	Singleton	Spontaneous labor	40	Cephalic	5
HA	32	C_section	Multiparous	Yes	Singleton	C-section before labor	40	Cephalic	5
HA	32	C_section	Multiparous	Yes	Singleton	Spontaneous labor	40	Cephalic	5
HA	32	C_section	Multiparous	Yes	Singleton	Induced labor	41	Cephalic	5
HA	32	C_section	Multiparous	Yes	Singleton	Spontaneous labor	39	Cephalic	5
HA	32	C_section	Multiparous	Yes	Singleton	Spontaneous labor	40	Cephalic	5
HA	32	C_section	Multiparous	Yes	Singleton	Spontaneous labor	41	Cephalic	5
HA	32	C_section	Multiparous	Yes	Singleton	Spontaneous labor	40	Cephalic	5
HA	32	C_section	Multiparous	Yes	Singleton	C-section before labor	41	Cephalic	5
HA	32	C_section	Multiparous	Yes	Singleton	Spontaneous labor	39	Cephalic	5
HA	32	C_section	Multiparous	Yes	Singleton	Spontaneous labor	40	Cephalic	5
HA	32	C_section	Multiparous	Yes	Singleton	Spontaneous labor	38	Cephalic	5
HA	32	C_section	Multiparous	Yes	Singleton	Spontaneous labor	40	Cephalic	5
HB	32	C_section	Multiparous	Yes	Singleton	Spontaneous labor	39	Cephalic	5
HB	32	C_section	Multiparous	Yes	Singleton	C-section before labor	37	Cephalic	5
HB	32	C_section	Multiparous	Yes	Singleton	C-section before labor	41	Cephalic	5
HB	32	C_section	Multiparous	Yes	Singleton	C-section before labor	39	Cephalic	5
HA	32	C_section	Multiparous	Yes	Singleton	C-section before labor	38	Cephalic	5
HA	32	C_section	Multiparous	Yes	Singleton	C-section before labor	39	Cephalic	5
HA	32	C_section	Multiparous	Yes	Singleton	C-section before labor	39	Cephalic	5
HA	32	C_section	Multiparous	Yes	Singleton	C-section before labor	37	Cephalic	5
HB	32	C_section	Multiparous	Yes	Singleton	C-section before labor	38	Cephalic	5
HB	32	C_section	Multiparous	Yes	Singleton	C-section before labor	39	Cephalic	5
HA	31	C_section	Multiparous	Yes	Singleton	Spontaneous labor	40	Cephalic	5
HA	31	C_section	Multiparous	Yes	Singleton	Spontaneous labor	40	Cephalic	5
HA	31	C_section	Multiparous	Yes	Singleton	Spontaneous labor	39	Cephalic	5
HA	31	C_section	Multiparous	Yes	Singleton	Spontaneous labor	38	Cephalic	5
HA	31	C_section	Multiparous	Yes	Singleton	Spontaneous labor	40	Cephalic	5
HA	31	C_section	Multiparous	Yes	Singleton	Spontaneous labor	40	Cephalic	5
HA	31	C_section	Multiparous	Yes	Singleton	Spontaneous labor	40	Cephalic	5
HA	31	C_section	Multiparous	Yes	Singleton	Spontaneous labor	40	Cephalic	5
HA	31	C_section	Multiparous	Yes	Singleton	Spontaneous labor	38	Cephalic	5
HA	31	C_section	Multiparous	Yes	Singleton	Spontaneous labor	40	Cephalic	5
HA	31	C_section	Multiparous	Yes	Singleton	C-section before labor	38	Cephalic	5
HA	31	C_section	Multiparous	Yes	Singleton	Spontaneous labor	40	Cephalic	5
HA	31	C_section	Multiparous	Yes	Singleton	C-section before labor	38	Cephalic	5
HB	31	C_section	Multiparous	Yes	Singleton	Spontaneous labor	39	Cephalic	5
HA	30	C_section	Multiparous	Yes	Singleton	Spontaneous labor	41	Cephalic	5
HA	30	C_section	Multiparous	Yes	Singleton	Spontaneous labor	39	Cephalic	5
HA	30	C_section	Multiparous	Yes	Singleton	Spontaneous labor	39	Cephalic	5
HB	30	C_section	Multiparous	Yes	Singleton	C-section before labor	41	Cephalic	5
HB	30	C_section	Multiparous	Yes	Singleton	C-section before labor	38	Cephalic	5
HB	30	C_section	Multiparous	Yes	Singleton	C-section before labor	39	Cephalic	5
HB	30	C_section	Multiparous	Yes	Singleton	C-section before labor	39	Cephalic	5
HB	30	C_section	Multiparous	Yes	Singleton	C-section before labor	41	Cephalic	5
HA	30	C_section	Multiparous	Yes	Singleton	Spontaneous labor	38	Cephalic	5
HA	30	C_section	Multiparous	Yes	Singleton	C-section before labor	41	Cephalic	5
HA	30	C_section	Multiparous	Yes	Singleton	C-section before labor	40	Cephalic	5
HA	30	C_section	Multiparous	Yes	Singleton	C-section before labor	38	Cephalic	5
HA	30	C_section	Multiparous	Yes	Singleton	C-section before labor	39	Cephalic	5
HA	30	C_section	Multiparous	Yes	Singleton	Spontaneous labor	40	Cephalic	5
HB	30	C_section	Multiparous	Yes	Singleton	C-section before labor	41	Cephalic	5
HB	30	C_section	Multiparous	Yes	Singleton	C-section before labor	38	Cephalic	5
HB	30	C_section	Multiparous	Yes	Singleton	Spontaneous labor	40	Cephalic	5
HA	29	C_section	Multiparous	Yes	Singleton	Spontaneous labor	37	Cephalic	5
HA	29	C_section	Multiparous	Yes	Singleton	Spontaneous labor	39	Cephalic	5
HA	29	C_section	Multiparous	Yes	Singleton	C-section before labor	41	Cephalic	5
HA	29	C_section	Multiparous	Yes	Singleton	Spontaneous labor	40	Cephalic	5
HA	29	C_section	Multiparous	Yes	Singleton	C-section before labor	39	Cephalic	5
HA	29	C_section	Multiparous	Yes	Singleton	C-section before labor	41	Cephalic	5
HA	29	C_section	Multiparous	Yes	Singleton	Spontaneous labor	41	Cephalic	5
HA	29	C_section	Multiparous	Yes	Singleton	Spontaneous labor	39	Cephalic	5
HA	29	C_section	Multiparous	Yes	Singleton	Spontaneous labor	40	Cephalic	5
HA	29	C_section	Multiparous	Yes	Singleton	Spontaneous labor	39	Cephalic	5
HA	29	C_section	Multiparous	Yes	Singleton	C-section before labor	40	Cephalic	5
HA	29	C_section	Multiparous	Yes	Singleton	C-section before labor	41	Cephalic	5
HA	29	C_section	Multiparous	Yes	Singleton	C-section before labor	40	Cephalic	5
HA	29	C_section	Multiparous	Yes	Singleton	Spontaneous labor	40	Cephalic	5
HB	29	C_section	Multiparous	Yes	Singleton	Spontaneous labor	39	Cephalic	5
HB	29	C_section	Multiparous	Yes	Singleton	C-section before labor	41	Cephalic	5
HB	29	C_section	Multiparous	Yes	Multiple	C-section before labor	41	Cephalic	5
HA	29	C_section	Multiparous	Yes	Singleton	Spontaneous labor	39	Cephalic	5
HA	29	C_section	Multiparous	Yes	Singleton	C-section before labor	39	Cephalic	5
HA	29	C_section	Multiparous	Yes	Singleton	C-section before labor	39	Cephalic	5
HB	29	C_section	Multiparous	Yes	Singleton	C-section before labor	40	Cephalic	5
HA	28	C_section	Multiparous	Yes	Singleton	C-section before labor	41	Cephalic	5
HA	28	C_section	Multiparous	Yes	Singleton	C-section before labor	38	Cephalic	5
HA	28	C_section	Multiparous	Yes	Singleton	Spontaneous labor	37	Cephalic	5
HA	28	C_section	Multiparous	Yes	Singleton	C-section before labor	39	Cephalic	5
HA	28	C_section	Multiparous	Yes	Singleton	Spontaneous labor	40	Cephalic	5
HA	28	C_section	Multiparous	Yes	Singleton	Spontaneous labor	39	Cephalic	5
HA	28	C_section	Multiparous	Yes	Singleton	Spontaneous labor	40	Cephalic	5
HA	28	C_section	Multiparous	Yes	Singleton	C-section before labor	42	Cephalic	5
HA	28	C_section	Multiparous	Yes	Singleton	C-section before labor	38	Cephalic	5
HA	28	C_section	Multiparous	Yes	Singleton	C-section before labor	41	Cephalic	5
HA	28	C_section	Multiparous	Yes	Singleton	C-section before labor	40	Cephalic	5
HA	28	C_section	Multiparous	Yes	Singleton	Spontaneous labor	39	Cephalic	5
HA	28	C_section	Multiparous	Yes	Singleton	Spontaneous labor	40	Cephalic	5
HA	28	C_section	Multiparous	Yes	Singleton	C-section before labor	40	Cephalic	5
HA	28	C_section	Multiparous	Yes	Singleton	C-section before labor	41	Cephalic	5
HB	28	C_section	Multiparous	Yes	Singleton	C-section before labor	38	Cephalic	5
HB	28	C_section	Multiparous	Yes	Singleton	Spontaneous labor	39	Cephalic	5
HB	28	C_section	Multiparous	Yes	Singleton	C-section before labor	41	Cephalic	5
HB	28	C_section	Multiparous	Yes	Singleton	C-section before labor	42	Cephalic	5
HB	28	C_section	Multiparous	Yes	Singleton	Spontaneous labor	40	Cephalic	5
HB	28	C_section	Multiparous	Yes	Singleton	C-section before labor	40	Cephalic	5
HB	28	C_section	Multiparous	Yes	Singleton	C-section before labor	37	Cephalic	5
HB	28	C_section	Multiparous	Yes	Singleton	Spontaneous labor	40	Cephalic	5
HB	28	C_section	Multiparous	Yes	Singleton	Spontaneous labor	39	Cephalic	5
HA	28	C_section	Multiparous	Yes	Singleton	C-section before labor	38	Cephalic	5
HA	28	C_section	Multiparous	Yes	Singleton	Spontaneous labor	39	Cephalic	5
HB	28	C_section	Multiparous	Yes	Singleton	C-section before labor	39	Cephalic	5
HA	27	C_section	Multiparous	Yes	Singleton	Spontaneous labor	40	Cephalic	5
HA	27	C_section	Multiparous	Yes	Singleton	C-section before labor	41	Cephalic	5
HA	27	C_section	Multiparous	Yes	Singleton	Spontaneous labor	41	Cephalic	5
HA	27	C_section	Multiparous	Yes	Singleton	C-section before labor	41	Cephalic	5
HA	27	C_section	Multiparous	Yes	Singleton	C-section before labor	41	Cephalic	5
HA	27	C_section	Multiparous	Yes	Singleton	Spontaneous labor	41	Cephalic	5
HA	27	C_section	Multiparous	Yes	Singleton	C-section before labor	37	Cephalic	5
HA	27	C_section	Multiparous	Yes	Singleton	C-section before labor	40	Cephalic	5
HA	27	C_section	Multiparous	Yes	Singleton	C-section before labor	40	Cephalic	5
HA	27	C_section	Multiparous	Yes	Singleton	Spontaneous labor	39	Cephalic	5
HA	27	C_section	Multiparous	Yes	Singleton	Spontaneous labor	39	Cephalic	5
HA	27	C_section	Multiparous	Yes	Singleton	C-section before labor	40	Cephalic	5
HA	27	C_section	Multiparous	Yes	Singleton	C-section before labor	38	Cephalic	5
HA	27	C_section	Multiparous	Yes	Singleton	Spontaneous labor	40	Cephalic	5
HA	27	C_section	Multiparous	Yes	Singleton	Spontaneous labor	40	Cephalic	5
HA	27	C_section	Multiparous	Yes	Singleton	Spontaneous labor	41	Cephalic	5
HB	27	C_section	Multiparous	Yes	Singleton	Induced labor	41	Cephalic	5
HB	27	C_section	Multiparous	Yes	Singleton	Spontaneous labor	38	Cephalic	5
HB	27	C_section	Multiparous	Yes	Singleton	Spontaneous labor	39	Cephalic	5
HB	27	C_section	Multiparous	Yes	Singleton	C-section before labor	41	Cephalic	5
HB	27	C_section	Multiparous	Yes	Singleton	C-section before labor	40	Cephalic	5
HB	27	C_section	Multiparous	Yes	Singleton	Spontaneous labor	39	Cephalic	5
HB	27	C_section	Multiparous	Yes	Singleton	C-section before labor	41	Cephalic	5
HA	27	C_section	Multiparous	Yes	Singleton	Spontaneous labor	40	Cephalic	5
HA	27	C_section	Multiparous	Yes	Singleton	Spontaneous labor	41	Cephalic	5
HA	27	C_section	Multiparous	Yes	Singleton	Spontaneous labor	40	Cephalic	5
HA	27	C_section	Multiparous	Yes	Singleton	Spontaneous labor	40	Cephalic	5
HB	27	C_section	Multiparous	Yes	Singleton	C-section before labor	37	Cephalic	5
HB	27	C_section	Multiparous	Yes	Singleton	C-section before labor	40	Cephalic	5
HB	27	C_section	Multiparous	Yes	Singleton	C-section before labor	38	Cephalic	5
HA	26	C_section	Multiparous	Yes	Singleton	C-section before labor	37	Cephalic	5
HA	26	C_section	Multiparous	Yes	Singleton	C-section before labor	41	Cephalic	5
HA	26	C_section	Multiparous	Yes	Singleton	C-section before labor	41	Cephalic	5
HA	26	C_section	Multiparous	Yes	Singleton	Spontaneous labor	40	Cephalic	5
HA	26	C_section	Multiparous	Yes	Singleton	Spontaneous labor	41	Cephalic	5
HA	26	C_section	Multiparous	Yes	Singleton	C-section before labor	39	Cephalic	5
HA	26	C_section	Multiparous	Yes	Singleton	Spontaneous labor	39	Cephalic	5
HA	26	C_section	Multiparous	Yes	Singleton	Spontaneous labor	41	Cephalic	5
HA	26	C_section	Multiparous	Yes	Singleton	Spontaneous labor	41	Cephalic	5
HA	26	C_section	Multiparous	Yes	Singleton	C-section before labor	41	Cephalic	5
HA	26	C_section	Multiparous	Yes	Singleton	C-section before labor	41	Cephalic	5
HA	26	C_section	Multiparous	Yes	Singleton	Spontaneous labor	41	Cephalic	5
HA	26	C_section	Multiparous	Yes	Singleton	Spontaneous labor	41	Cephalic	5
HA	26	C_section	Multiparous	Yes	Singleton	C-section before labor	40	Cephalic	5
HA	26	C_section	Multiparous	Yes	Singleton	Spontaneous labor	38	Cephalic	5
HA	26	C_section	Multiparous	Yes	Singleton	Spontaneous labor	41	Cephalic	5
HA	26	C_section	Multiparous	Yes	Singleton	Spontaneous labor	39	Cephalic	5
HA	26	C_section	Multiparous	Yes	Singleton	Spontaneous labor	40	Cephalic	5
HB	26	C_section	Multiparous	Yes	Singleton	C-section before labor	41	Cephalic	5
HB	26	C_section	Multiparous	Yes	Singleton	Spontaneous labor	39	Cephalic	5
HB	26	C_section	Multiparous	Yes	Singleton	Spontaneous labor	40	Cephalic	5
HB	26	C_section	Multiparous	Yes	Singleton	Spontaneous labor	38	Cephalic	5
HB	26	C_section	Multiparous	Yes	Singleton	C-section before labor	41	Cephalic	5
HB	26	C_section	Multiparous	Yes	Singleton	Spontaneous labor	39	Cephalic	5
HB	26	C_section	Multiparous	Yes	Singleton	Spontaneous labor	41	Cephalic	5
HA	26	C_section	Multiparous	Yes	Singleton	Spontaneous labor	39	Cephalic	5
HA	26	C_section	Multiparous	Yes	Singleton	C-section before labor	41	Cephalic	5
HA	26	C_section	Multiparous	Yes	Singleton	C-section before labor	41	Cephalic	5
HB	26	C_section	Multiparous	Yes	Singleton	C-section before labor	37	Cephalic	5
HB	26	C_section	Multiparous	Yes	Singleton	C-section before labor	39	Cephalic	5
HA	25	C_section	Multiparous	Yes	Singleton	C-section before labor	40	Cephalic	5
HA	25	C_section	Multiparous	Yes	Singleton	C-section before labor	40	Cephalic	5
HA	25	C_section	Multiparous	Yes	Singleton	Spontaneous labor	41	Cephalic	5
HA	25	C_section	Multiparous	Yes	Singleton	Spontaneous labor	38	Cephalic	5
HA	25	C_section	Multiparous	Yes	Singleton	C-section before labor	39	Cephalic	5
HA	25	C_section	Multiparous	Yes	Singleton	Spontaneous labor	40	Cephalic	5
HA	25	C_section	Multiparous	Yes	Singleton	Spontaneous labor	41	Cephalic	5
HA	25	C_section	Multiparous	Yes	Singleton	Spontaneous labor	40	Cephalic	5
HA	25	C_section	Multiparous	Yes	Singleton	Spontaneous labor	39	Cephalic	5
HA	25	C_section	Multiparous	Yes	Singleton	Spontaneous labor	40	Cephalic	5
HA	25	C_section	Multiparous	Yes	Singleton	C-section before labor	41	Cephalic	5
HA	25	C_section	Multiparous	Yes	Singleton	Spontaneous labor	40	Cephalic	5
HA	25	C_section	Multiparous	Yes	Singleton	Induced labor	38	Cephalic	5
HA	25	C_section	Multiparous	Yes	Singleton	Spontaneous labor	40	Cephalic	5
HA	25	C_section	Multiparous	Yes	Singleton	Spontaneous labor	41	Cephalic	5
HB	25	C_section	Multiparous	Yes	Singleton	Spontaneous labor	39	Cephalic	5
HB	25	C_section	Multiparous	Yes	Singleton	Spontaneous labor	40	Cephalic	5
HB	25	C_section	Multiparous	Yes	Singleton	C-section before labor	40	Cephalic	5
HB	25	C_section	Multiparous	Yes	Singleton	C-section before labor	41	Cephalic	5
HB	25	C_section	Multiparous	Yes	Singleton	Spontaneous labor	40	Cephalic	5
HA	25	C_section	Multiparous	Yes	Singleton	C-section before labor	40	Cephalic	5
HA	25	C_section	Multiparous	Yes	Singleton	Spontaneous labor	40	Cephalic	5
HA	25	C_section	Multiparous	Yes	Singleton	Spontaneous labor	38	Cephalic	5
HB	25	C_section	Multiparous	Yes	Singleton	C-section before labor	39	Cephalic	5
HA	24	C_section	Multiparous	Yes	Singleton	Spontaneous labor	37	Cephalic	5
HA	24	C_section	Multiparous	Yes	Singleton	Spontaneous labor	40	Cephalic	5
HA	24	C_section	Multiparous	Yes	Singleton	Spontaneous labor	40	Cephalic	5
HA	24	C_section	Multiparous	Yes	Singleton	C-section before labor	41	Cephalic	5
HA	24	C_section	Multiparous	Yes	Singleton	C-section before labor	40	Cephalic	5
HB	24	C_section	Multiparous	Yes	Singleton	C-section before labor	39	Cephalic	5
HB	24	C_section	Multiparous	Yes	Singleton	C-section before labor	41	Cephalic	5
HB	24	C_section	Multiparous	Yes	Singleton	C-section before labor	41	Cephalic	5
HB	24	C_section	Multiparous	Yes	Singleton	C-section before labor	42	Cephalic	5
HA	24	C_section	Multiparous	Yes	Singleton	C-section before labor	39	Cephalic	5
HA	24	C_section	Multiparous	Yes	Singleton	C-section before labor	37	Cephalic	5
HA	23	C_section	Multiparous	Yes	Singleton	Spontaneous labor	38	Cephalic	5
HA	23	C_section	Multiparous	Yes	Singleton	Spontaneous labor	40	Cephalic	5
HA	23	C_section	Multiparous	Yes	Singleton	Spontaneous labor	41	Cephalic	5
HA	23	C_section	Multiparous	Yes	Singleton	C-section before labor	40	Cephalic	5
HA	23	C_section	Multiparous	Yes	Singleton	Spontaneous labor	40	Cephalic	5
HA	23	C_section	Multiparous	Yes	Singleton	C-section before labor	41	Cephalic	5
HA	23	C_section	Multiparous	Yes	Singleton	Spontaneous labor	40	Cephalic	5
HA	23	C_section	Multiparous	Yes	Singleton	C-section before labor	40	Cephalic	5
HA	23	C_section	Multiparous	Yes	Singleton	C-section before labor	39	Cephalic	5
HA	23	C_section	Multiparous	Yes	Singleton	C-section before labor	42	Cephalic	5
HA	23	C_section	Multiparous	Yes	Singleton	Spontaneous labor	40	Cephalic	5
HA	23	C_section	Multiparous	Yes	Singleton	C-section before labor	40	Cephalic	5
HA	23	C_section	Multiparous	Yes	Singleton	Spontaneous labor	40	Cephalic	5
HA	23	C_section	Multiparous	Yes	Singleton	Spontaneous labor	39	Cephalic	5
HA	23	C_section	Multiparous	Yes	Singleton	Spontaneous labor	39	Cephalic	5
HA	23	C_section	Multiparous	Yes	Singleton	Spontaneous labor	39	Cephalic	5
HA	23	C_section	Multiparous	Yes	Singleton	C-section before labor	39	Cephalic	5
HA	23	C_section	Multiparous	Yes	Singleton	Spontaneous labor	40	Cephalic	5
HA	23	C_section	Multiparous	Yes	Singleton	Spontaneous labor	39	Cephalic	5
HA	23	C_section	Multiparous	Yes	Singleton	C-section before labor	41	Cephalic	5
HA	23	C_section	Multiparous	Yes	Singleton	Spontaneous labor	40	Cephalic	5
HA	23	C_section	Multiparous	Yes	Singleton	Spontaneous labor	40	Cephalic	5
HA	23	C_section	Multiparous	Yes	Singleton	Spontaneous labor	41	Cephalic	5
HA	23	C_section	Multiparous	Yes	Singleton	Spontaneous labor	40	Cephalic	5
HA	23	C_section	Multiparous	Yes	Singleton	Spontaneous labor	40	Cephalic	5
HB	23	C_section	Multiparous	Yes	Singleton	Spontaneous labor	38	Cephalic	5
HB	23	C_section	Multiparous	Yes	Singleton	C-section before labor	41	Cephalic	5
HB	23	C_section	Multiparous	Yes	Singleton	C-section before labor	40	Cephalic	5
HB	23	C_section	Multiparous	Yes	Singleton	Spontaneous labor	40	Cephalic	5
HA	23	C_section	Multiparous	Yes	Singleton	C-section before labor	41	Cephalic	5
HA	23	C_section	Multiparous	Yes	Singleton	C-section before labor	39	Cephalic	5
HB	23	C_section	Multiparous	Yes	Singleton	C-section before labor	39	Cephalic	5
HA	22	C_section	Multiparous	Yes	Singleton	Spontaneous labor	41	Cephalic	5
HA	22	C_section	Multiparous	Yes	Singleton	Spontaneous labor	41	Cephalic	5
HA	22	C_section	Multiparous	Yes	Singleton	Spontaneous labor	38	Cephalic	5
HA	22	C_section	Multiparous	Yes	Singleton	Spontaneous labor	41	Cephalic	5
HA	22	C_section	Multiparous	Yes	Singleton	Spontaneous labor	39	Cephalic	5
HA	22	C_section	Multiparous	Yes	Singleton	C-section before labor	40	Cephalic	5
HA	22	C_section	Multiparous	Yes	Singleton	Spontaneous labor	38	Cephalic	5
HA	22	C_section	Multiparous	Yes	Singleton	C-section before labor	41	Cephalic	5
HA	22	C_section	Multiparous	Yes	Singleton	C-section before labor	37	Cephalic	5
HA	22	C_section	Multiparous	Yes	Singleton	Spontaneous labor	39	Cephalic	5
HA	22	C_section	Multiparous	Yes	Singleton	Spontaneous labor	40	Cephalic	5
HA	22	C_section	Multiparous	Yes	Singleton	Spontaneous labor	41	Cephalic	5
HA	22	C_section	Multiparous	Yes	Singleton	Spontaneous labor	40	Cephalic	5
HA	22	C_section	Multiparous	Yes	Singleton	C-section before labor	41	Cephalic	5
HA	22	C_section	Multiparous	Yes	Singleton	Spontaneous labor	40	Cephalic	5
HA	22	C_section	Multiparous	Yes	Singleton	Spontaneous labor	40	Cephalic	5
HA	22	C_section	Multiparous	Yes	Singleton	Spontaneous labor	39	Cephalic	5
HB	22	C_section	Multiparous	Yes	Singleton	C-section before labor	41	Cephalic	5
HB	22	C_section	Multiparous	Yes	Singleton	C-section before labor	40	Cephalic	5
HB	22	C_section	Multiparous	Yes	Singleton	Induced labor	40	Cephalic	5
HA	22	C_section	Multiparous	Yes	Singleton	Spontaneous labor	37	Cephalic	5
HA	22	C_section	Multiparous	Yes	Singleton	C-section before labor	41	Cephalic	5
HA	22	C_section	Multiparous	Yes	Singleton	C-section before labor	38	Cephalic	5
HA	22	C_section	Multiparous	Yes	Singleton	C-section before labor	37	Cephalic	5
HA	22	C_section	Multiparous	Yes	Singleton	C-section before labor	40	Cephalic	5
HB	22	C_section	Multiparous	Yes	Singleton	C-section before labor	38	Cephalic	5
HA	21	C_section	Multiparous	Yes	Singleton	Spontaneous labor	40	Cephalic	5
HA	21	C_section	Multiparous	Yes	Singleton	C-section before labor	38	Cephalic	5
HA	21	C_section	Multiparous	Yes	Singleton	Spontaneous labor	40	Cephalic	5
HA	21	C_section	Multiparous	Yes	Singleton	Spontaneous labor	39	Cephalic	5
HA	21	C_section	Multiparous	Yes	Singleton	Spontaneous labor	40	Cephalic	5
HA	21	C_section	Multiparous	Yes	Singleton	Spontaneous labor	41	Cephalic	5
HA	21	C_section	Multiparous	Yes	Singleton	C-section before labor	39	Cephalic	5
HA	21	C_section	Multiparous	Yes	Singleton	Spontaneous labor	41	Cephalic	5
HB	21	C_section	Multiparous	Yes	Singleton	Spontaneous labor	38	Cephalic	5
HB	21	C_section	Multiparous	Yes	Singleton	Spontaneous labor	41	Cephalic	5
HB	21	C_section	Multiparous	Yes	Singleton	C-section before labor	41	Cephalic	5
HB	21	C_section	Multiparous	Yes	Singleton	C-section before labor	41	Cephalic	5
HA	21	C_section	Multiparous	Yes	Singleton	Spontaneous labor	37	Cephalic	5
HA	20	C_section	Multiparous	Yes	Singleton	Spontaneous labor	41	Cephalic	5
HA	20	C_section	Multiparous	Yes	Singleton	Spontaneous labor	37	Cephalic	5
HA	20	C_section	Multiparous	Yes	Singleton	Spontaneous labor	38	Cephalic	5
HA	20	C_section	Multiparous	Yes	Singleton	C-section before labor	40	Cephalic	5
HA	20	C_section	Multiparous	Yes	Singleton	C-section before labor	40	Cephalic	5
HA	20	C_section	Multiparous	Yes	Singleton	Spontaneous labor	41	Cephalic	5
HA	20	C_section	Multiparous	Yes	Singleton	Spontaneous labor	39	Cephalic	5
HA	20	C_section	Multiparous	Yes	Singleton	C-section before labor	40	Cephalic	5
HA	20	C_section	Multiparous	Yes	Singleton	Spontaneous labor	41	Cephalic	5
HA	20	C_section	Multiparous	Yes	Singleton	Spontaneous labor	39	Cephalic	5
HA	20	C_section	Multiparous	Yes	Singleton	Spontaneous labor	39	Cephalic	5
HA	20	C_section	Multiparous	Yes	Singleton	Spontaneous labor	40	Cephalic	5
HA	20	C_section	Multiparous	Yes	Singleton	Spontaneous labor	40	Cephalic	5
HA	20	C_section	Multiparous	Yes	Singleton	Spontaneous labor	39	Cephalic	5
HA	20	C_section	Multiparous	Yes	Singleton	Spontaneous labor	38	Cephalic	5
HB	20	C_section	Multiparous	Yes	Singleton	C-section before labor	41	Cephalic	5
HB	20	C_section	Multiparous	Yes	Singleton	C-section before labor	41	Cephalic	5
HB	20	C_section	Multiparous	Yes	Singleton	Spontaneous labor	40	Cephalic	5
HB	20	C_section	Multiparous	Yes	Singleton	Spontaneous labor	40	Cephalic	5
HA	20	C_section	Multiparous	Yes	Singleton	C-section before labor	40	Cephalic	5
HA	20	C_section	Multiparous	Yes	Singleton	Spontaneous labor	38	Cephalic	5
HA	19	C_section	Multiparous	Yes	Singleton	C-section before labor	40	Cephalic	5
HA	19	C_section	Multiparous	Yes	Singleton	Spontaneous labor	38	Cephalic	5
HA	19	C_section	Multiparous	Yes	Singleton	C-section before labor	41	Cephalic	5
HA	19	C_section	Multiparous	Yes	Singleton	Spontaneous labor	41	Cephalic	5
HA	19	C_section	Multiparous	Yes	Singleton	Spontaneous labor	39	Cephalic	5
HA	19	C_section	Multiparous	Yes	Singleton	Spontaneous labor	40	Cephalic	5
HA	19	C_section	Multiparous	Yes	Singleton	Spontaneous labor	40	Cephalic	5
HB	19	C_section	Multiparous	Yes	Singleton	Induced labor	39	Cephalic	5
HB	19	C_section	Multiparous	Yes	Singleton	C-section before labor	41	Cephalic	5
HB	19	C_section	Multiparous	Yes	Singleton	C-section before labor	37	Cephalic	5
HA	18	C_section	Multiparous	Yes	Singleton	C-section before labor	41	Cephalic	5
HA	18	C_section	Multiparous	Yes	Singleton	C-section before labor	41	Cephalic	5
HA	18	C_section	Multiparous	Yes	Singleton	Spontaneous labor	41	Cephalic	5
HA	18	C_section	Multiparous	Yes	Singleton	C-section before labor	41	Cephalic	5
HA	18	C_section	Multiparous	Yes	Singleton	Spontaneous labor	40	Cephalic	5
HA	18	C_section	Multiparous	Yes	Singleton	Spontaneous labor	39	Cephalic	5
HA	18	C_section	Multiparous	Yes	Singleton	Spontaneous labor	39	Cephalic	5
HA	17	C_section	Multiparous	Yes	Singleton	Spontaneous labor	39	Cephalic	5
HA	17	C_section	Multiparous	Yes	Singleton	C-section before labor	40	Cephalic	5
HA	17	C_section	Multiparous	Yes	Singleton	Spontaneous labor	39	Cephalic	5
HA	17	C_section	Multiparous	Yes	Singleton	Spontaneous labor	40	Cephalic	5
HA	26	C_section	Multiparous	Yes	Singleton	Spontaneous labor	40	Cephalic	5
HA	34	C_section	Multiparous	Yes	Singleton	C-section before labor	38	Cephalic	5
HB	31	C_section	Multiparous	Yes	Singleton	Induced labor	39	Cephalic	5
HA	38	C_section	Multiparous	Yes	Singleton	C-section before labor	38	Cephalic	5
HA	28	C_section	Multiparous	Yes	Singleton	C-section before labor	39	Cephalic	5
HA	25	C_section	Multiparous	Yes	Singleton	C-section before labor	39	Cephalic	5
HA	25	C_section	Multiparous	Yes	Singleton	C-section before labor	40	Cephalic	5
HA	41	C_section	Multiparous	Yes	Singleton	C-section before labor	37	Cephalic	5
HA	35	C_section	Multiparous	Yes	Singleton	C-section before labor	37	Cephalic	5
HA	35	C_section	Multiparous	Yes	Singleton	C-section before labor	37	Cephalic	5
HB	34	C_section	Multiparous	Yes	Singleton	C-section before labor	39	Cephalic	5
HA	33	C_section	Multiparous	Yes	Singleton	C-section before labor	39	Cephalic	5
HA	19	C_section	Multiparous	Yes	Singleton	C-section before labor	39	Cephalic	5
HA	35	C_section	Multiparous	Yes	Singleton	Spontaneous labor	40	Cephalic	5
HA	35	C_section	Multiparous	Yes	Singleton	Spontaneous labor	40	Cephalic	5
HA	34	C_section	Multiparous	Yes	Singleton	C-section before labor	38	Cephalic	5
HA	33	C_section	Multiparous	Yes	Singleton	Spontaneous labor	40	Cephalic	5
HA	33	C_section	Multiparous	Yes	Singleton	Spontaneous labor	40	Cephalic	5
HA	32	C_section	Multiparous	Yes	Singleton	Spontaneous labor	39	Cephalic	5
HB	32	C_section	Multiparous	Yes	Singleton	Spontaneous labor	39	Cephalic	5
HA	32	C_section	Multiparous	Yes	Singleton	Spontaneous labor	38	Cephalic	5
HA	31	C_section	Multiparous	Yes	Singleton	C-section before labor	40	Cephalic	5
HA	31	C_section	Multiparous	Yes	Singleton	Spontaneous labor	40	Cephalic	5
HA	31	C_section	Multiparous	Yes	Singleton	Spontaneous labor	40	Cephalic	5
HA	28	C_section	Multiparous	Yes	Singleton	C-section before labor	40	Cephalic	5
HA	27	C_section	Multiparous	Yes	Singleton	C-section before labor	41	Cephalic	5
HA	27	C_section	Multiparous	Yes	Singleton	Spontaneous labor	39	Cephalic	5
HA	26	C_section	Multiparous	Yes	Singleton	C-section before labor	38	Cephalic	5
HA	23	C_section	Multiparous	Yes	Singleton	Spontaneous labor	40	Cephalic	5
HA	22	C_section	Multiparous	Yes	Singleton	Spontaneous labor	39	Cephalic	5
HA	21	C_section	Multiparous	Yes	Singleton	C-section before labor	40	Cephalic	5
HA	19	C_section	Multiparous	Yes	Singleton	C-section before labor	37	Cephalic	5
HB	45	C_section	Multiparous	No	Singleton	Induced labor	40	Cephalic	4
HA	41	C_section	Multiparous	No	Singleton	Induced labor	38	Cephalic	4
HB	39	C_section	Multiparous	No	Singleton	Induced labor	40	Cephalic	4
HB	35	C_section	Multiparous	No	Singleton	C-section before labor	40	Cephalic	4
HA	34	C_section	Multiparous	No	Singleton	C-section before labor	41	Cephalic	4
HB	34	C_section	Multiparous	No	Singleton	C-section before labor	41	Cephalic	4
HB	32	C_section	Multiparous	No	Singleton	C-section before labor	39	Cephalic	4
HB	39	C_section	Multiparous	No	Singleton	Induced labor	38	Cephalic	4
HA	38	C_section	Multiparous	No	Singleton	Induced labor	38	Cephalic	4
HA	37	C_section	Multiparous	No	Singleton	Induced labor	41	Cephalic	4
HA	34	C_section	Multiparous	No	Singleton	Induced labor	37	Cephalic	4
HA	26	C_section	Multiparous	No	Singleton	C-section before labor	40	Cephalic	4
HA	25	C_section	Multiparous	No	Singleton	C-section before labor	41	Cephalic	4
HA	31	C_section	Multiparous	No	Singleton	C-section before labor	38	Cephalic	4
HA	43	C_section	Multiparous	No	Singleton	Induced labor	39	Cephalic	4
HA	42	C_section	Multiparous	No	Singleton	C-section before labor	37	Cephalic	4
HA	40	C_section	Multiparous	No	Singleton	Induced labor	38	Cephalic	4
HA	39	C_section	Multiparous	No	Singleton	C-section before labor	39	Cephalic	4
HB	38	C_section	Multiparous	No	Singleton	Induced labor	41	Cephalic	4
HB	36	C_section	Multiparous	No	Singleton	Induced labor	40	Cephalic	4
HA	36	C_section	Multiparous	No	Singleton	Induced labor	39	Cephalic	4
HA	33	C_section	Multiparous	No	Singleton	C-section before labor	38	Cephalic	4
HA	33	C_section	Multiparous	No	Singleton	Induced labor	41	Cephalic	4
HA	33	C_section	Multiparous	No	Singleton	Induced labor	40	Cephalic	4
HB	32	C_section	Multiparous	No	Singleton	Induced labor	39	Cephalic	4
HB	29	C_section	Multiparous	No	Singleton	C-section before labor	41	Cephalic	4
HB	29	C_section	Multiparous	No	Singleton	Induced labor	39	Cephalic	4
HA	28	C_section	Multiparous	No	Singleton	C-section before labor	40	Cephalic	4
HA	26	C_section	Multiparous	No	Singleton	Induced labor	40	Cephalic	4
HA	25	C_section	Multiparous	No	Singleton	Induced labor	38	Cephalic	4
HA	21	C_section	Multiparous	No	Singleton	C-section before labor	37	Cephalic	4
HA	20	C_section	Multiparous	No	Singleton	C-section before labor	42	Cephalic	4
HA	20	C_section	Multiparous	No	Singleton	C-section before labor	37	Cephalic	4
HA	18	C_section	Multiparous	No	Singleton	C-section before labor	39	Cephalic	4
HA	18	C_section	Multiparous	No	Singleton	Induced labor	39	Cephalic	4
HB	44	C_section	Multiparous	No	Singleton	C-section before labor	38	Cephalic	4
HB	30	C_section	Multiparous	No	Singleton	C-section before labor	40	Cephalic	4
HA	24	C_section	Multiparous	No	Singleton	C-section before labor	37	Cephalic	4
HB	40	C_section	Multiparous	No	Singleton	C-section before labor	42	Cephalic	4
HB	35	C_section	Multiparous	No	Singleton	C-section before labor	41	Cephalic	4
HB	34	C_section	Multiparous	No	Singleton	Induced labor	41	Cephalic	4
HB	28	C_section	Multiparous	No	Singleton	Induced labor	41	Cephalic	4
HA	34	C_section	Multiparous	No	Singleton	C-section before labor	33	Cephalic	4
HB	26	C_section	Multiparous	No	Singleton	C-section before labor	37	Cephalic	4
HB	26	C_section	Multiparous	No	Singleton	C-section before labor	37	Cephalic	4
HA	22	C_section	Multiparous	No	Singleton	C-section before labor	32	Cephalic	4
HB	45	C_section	Multiparous	No	Singleton	Induced labor	38	Cephalic	4
HB	41	C_section	Multiparous	No	Singleton	C-section before labor	37	Cephalic	4
HB	37	C_section	Multiparous	No	Singleton	C-section before labor	40	Cephalic	4
HB	34	C_section	Multiparous	No	Singleton	C-section before labor	40	Cephalic	4
HA	33	C_section	Multiparous	No	Singleton	C-section before labor	38	Cephalic	4
HB	32	C_section	Multiparous	No	Singleton	C-section before labor	37	Cephalic	4
HB	32	C_section	Multiparous	No	Singleton	C-section before labor	39	Cephalic	4
HA	31	C_section	Multiparous	No	Singleton	Induced labor	41	Cephalic	4
HA	29	C_section	Multiparous	No	Singleton	C-section before labor	39	Cephalic	4
HB	29	C_section	Multiparous	No	Singleton	Induced labor	37	Cephalic	4
HA	28	C_section	Multiparous	No	Singleton	C-section before labor	27	Cephalic	4
HA	26	C_section	Multiparous	No	Singleton	C-section before labor	37	Cephalic	4
HA	24	C_section	Multiparous	No	Singleton	C-section before labor	40	Cephalic	4
HA	26	C_section	Multiparous	No	Singleton	C-section before labor	38	Cephalic	4
HA	39	C_section	Multiparous	No	Singleton	Spontaneous labor	39	Cephalic	4
HA	27	C_section	Multiparous	No	Singleton	Induced labor	41	Cephalic	4
HA	27	C_section	Multiparous	No	Singleton	Induced labor	41	Cephalic	4
HB	27	C_section	Multiparous	No	Singleton	Induced labor	41	Cephalic	4
HB	25	C_section	Multiparous	No	Singleton	Induced labor	38	Cephalic	4
HA	24	C_section	Multiparous	No	Singleton	Induced labor	38	Cephalic	4
HA	20	C_section	Multiparous	No	Singleton	Induced labor	41	Cephalic	4
HB	35	C_section	Multiparous	No	Singleton	C-section before labor	39	Cephalic	4
HA	36	C_section	Multiparous	No	Singleton	C-section before labor	37	Cephalic	4
HA	36	C_section	Multiparous	No	Singleton	Induced labor	41	Cephalic	4
HA	35	C_section	Multiparous	No	Singleton	C-section before labor	40	Cephalic	4
HA	35	C_section	Multiparous	No	Singleton	C-section before labor	41	Cephalic	4
HA	35	C_section	Multiparous	No	Singleton	C-section before labor	42	Cephalic	4
HA	33	C_section	Multiparous	No	Singleton	C-section before labor	41	Cephalic	4
HA	33	C_section	Multiparous	No	Singleton	C-section before labor	40	Cephalic	4
HA	32	C_section	Multiparous	No	Singleton	C-section before labor	40	Cephalic	4
HA	31	C_section	Multiparous	No	Singleton	C-section before labor	39	Cephalic	4
HA	31	C_section	Multiparous	No	Singleton	Induced labor	40	Cephalic	4
HA	30	C_section	Multiparous	No	Singleton	C-section before labor	39	Cephalic	4
HA	29	C_section	Multiparous	No	Singleton	C-section before labor	38	Cephalic	4
HA	29	C_section	Multiparous	No	Singleton	C-section before labor	39	Cephalic	4
HA	27	C_section	Multiparous	No	Singleton	C-section before labor	40	Cephalic	4
HA	27	C_section	Multiparous	No	Singleton	C-section before labor	40	Cephalic	4
HA	24	C_section	Multiparous	No	Singleton	C-section before labor	41	Cephalic	4
HA	24	C_section	Multiparous	No	Singleton	C-section before labor	41	Cephalic	4
HA	33	C_section	Multiparous	No	Singleton	Induced labor	38	Cephalic	4
HA	30	C_section	Multiparous	No	Singleton	C-section before labor	37	Cephalic	4
HA	25	C_section	Multiparous	No	Singleton	C-section before labor	41	Cephalic	4
HA	46	C_section	Multiparous	No	Singleton	C-section before labor	39	Cephalic	4
HA	27	C_section	Multiparous	No	Singleton	C-section before labor	39	Cephalic	4
HA	22	C_section	Multiparous	No	Singleton	Spontaneous labor	39	Cephalic	4
HA	41	C_section	Multiparous	No	Singleton	C-section before labor	38	Cephalic	4
HA	33	C_section	Multiparous	No	Singleton	C-section before labor	38	Cephalic	4
HA	32	C_section	Multiparous	No	Singleton	C-section before labor	39	Cephalic	4
HA	31	C_section	Multiparous	No	Singleton	C-section before labor	37	Cephalic	4
HA	31	C_section	Multiparous	No	Singleton	C-section before labor	39	Cephalic	4
HA	25	C_section	Multiparous	No	Singleton	C-section before labor	37	Cephalic	4
HA	24	C_section	Multiparous	No	Singleton	C-section before labor	38	Cephalic	4
HA	23	C_section	Multiparous	No	Singleton	C-section before labor	40	Cephalic	4
HA	21	C_section	Multiparous	No	Singleton	C-section before labor	39	Cephalic	4
HA	44	C_section	Multiparous	No	Singleton	C-section before labor	37	Cephalic	4
HA	42	C_section	Multiparous	No	Singleton	Induced labor	41	Cephalic	4
HA	39	C_section	Multiparous	No	Singleton	C-section before labor	37	Cephalic	4
HA	37	C_section	Multiparous	No	Singleton	C-section before labor	38	Cephalic	4
HA	37	C_section	Multiparous	No	Singleton	C-section before labor	39	Cephalic	4
HA	37	C_section	Multiparous	No	Singleton	C-section before labor	41	Cephalic	4
HA	37	C_section	Multiparous	No	Singleton	C-section before labor	39	Cephalic	4
HA	36	C_section	Multiparous	No	Singleton	C-section before labor	38	Cephalic	4
HB	36	C_section	Multiparous	No	Singleton	C-section before labor	42	Cephalic	4
HB	36	C_section	Multiparous	No	Singleton	C-section before labor	39	Cephalic	4
HA	35	C_section	Multiparous	No	Singleton	C-section before labor	38	Cephalic	4
HA	34	C_section	Multiparous	No	Singleton	C-section before labor	40	Cephalic	4
HA	34	C_section	Multiparous	No	Singleton	C-section before labor	37	Cephalic	4
HA	34	C_section	Multiparous	No	Singleton	C-section before labor	38	Cephalic	4
HA	33	C_section	Multiparous	No	Singleton	C-section before labor	38	Cephalic	4
HA	32	C_section	Multiparous	No	Singleton	C-section before labor	40	Cephalic	4
HA	31	C_section	Multiparous	No	Singleton	C-section before labor	40	Cephalic	4
HA	29	C_section	Multiparous	No	Singleton	C-section before labor	38	Cephalic	4
HB	29	C_section	Multiparous	No	Singleton	C-section before labor	40	Cephalic	4
HA	28	C_section	Multiparous	No	Singleton	C-section before labor	41	Cephalic	4
HA	28	C_section	Multiparous	No	Singleton	Induced labor	41	Cephalic	4
HB	27	C_section	Multiparous	No	Singleton	C-section before labor	39	Cephalic	4
HA	25	C_section	Multiparous	No	Singleton	C-section before labor	39	Cephalic	4
HA	25	C_section	Multiparous	No	Singleton	Induced labor	39	Cephalic	4
HA	25	C_section	Multiparous	No	Singleton	C-section before labor	39	Cephalic	4
HA	24	C_section	Multiparous	No	Singleton	C-section before labor	39	Cephalic	4
HA	24	C_section	Multiparous	No	Singleton	C-section before labor	39	Cephalic	4
HA	24	C_section	Multiparous	No	Singleton	C-section before labor	39	Cephalic	4
HA	23	C_section	Multiparous	No	Singleton	C-section before labor	41	Cephalic	4
HA	23	C_section	Multiparous	No	Singleton	C-section before labor	40	Cephalic	4
HA	19	C_section	Multiparous	No	Singleton	C-section before labor	40	Cephalic	4
HB	34	C_section	Multiparous	No	Singleton	C-section before labor	38	Cephalic	4
HB	32	C_section	Multiparous	No	Singleton	C-section before labor	38	Cephalic	4
HA	19	C_section	Multiparous	No	Singleton	C-section before labor	37	Cephalic	4
HA	42	C_section	Multiparous	No	Singleton	C-section before labor	35	Cephalic	4
HB	37	C_section	Multiparous	No	Singleton	C-section before labor	39	Cephalic	4
HB	34	C_section	Multiparous	No	Singleton	Induced labor	41	Cephalic	4
HB	47	C_section	Multiparous	No	Singleton	C-section before labor	37	Cephalic	4
HA	33	C_section	Multiparous	No	Singleton	C-section before labor	38	Cephalic	4
HB	28	C_section	Multiparous	No	Singleton	C-section before labor	38	Cephalic	4
HB	38	C_section	Multiparous	No	Singleton	Induced labor	39	Cephalic	4
HA	44	C_section	Multiparous	No	Singleton	C-section before labor	37	Cephalic	4
HB	41	C_section	Multiparous	No	Singleton	Induced labor	38	Cephalic	4
HA	40	C_section	Multiparous	No	Singleton	Induced labor	41	Cephalic	4
HB	40	C_section	Multiparous	No	Singleton	Induced labor	39	Cephalic	4
HA	39	C_section	Multiparous	No	Singleton	Induced labor	39	Cephalic	4
HA	37	C_section	Multiparous	No	Singleton	Induced labor	39	Cephalic	4
HA	35	C_section	Multiparous	No	Singleton	Induced labor	40	Cephalic	4
HA	33	C_section	Multiparous	No	Singleton	Induced labor	39	Cephalic	4
HA	33	C_section	Multiparous	No	Singleton	Induced labor	39	Cephalic	4
HA	30	C_section	Multiparous	No	Singleton	Induced labor	41	Cephalic	4
HA	29	C_section	Multiparous	No	Singleton	Induced labor	41	Cephalic	4
HB	29	C_section	Multiparous	No	Singleton	Induced labor	41	Cephalic	4
HB	27	C_section	Multiparous	No	Singleton	Induced labor	41	Cephalic	4
HA	26	C_section	Multiparous	No	Singleton	C-section before labor	39	Cephalic	4
HA	25	C_section	Multiparous	No	Singleton	Induced labor	41	Cephalic	4
HA	25	C_section	Multiparous	No	Singleton	Induced labor	39	Cephalic	4
HA	23	C_section	Multiparous	No	Singleton	Induced labor	41	Cephalic	4
HA	23	C_section	Multiparous	No	Singleton	Induced labor	41	Cephalic	4
HB	23	C_section	Multiparous	No	Singleton	Induced labor	42	Cephalic	4
HA	21	C_section	Multiparous	No	Singleton	Induced labor	40	Cephalic	4
HB	21	C_section	Multiparous	No	Singleton	Induced labor	41	Cephalic	4
HB	20	C_section	Multiparous	No	Singleton	Induced labor	41	Cephalic	4
HB	19	C_section	Multiparous	No	Singleton	Induced labor	39	Cephalic	4
HB	18	C_section	Multiparous	No	Singleton	Induced labor	42	Cephalic	4
HA	17	C_section	Multiparous	No	Singleton	Induced labor	39	Cephalic	4
HB	37	C_section	Multiparous	No	Singleton	Induced labor	37	Cephalic	4
HA	27	C_section	Multiparous	No	Singleton	C-section before labor	35	Cephalic	4
HA	22	C_section	Multiparous	No	Singleton	Induced labor	39	Cephalic	4
HA	20	C_section	Multiparous	No	Singleton	C-section before labor	31	Cephalic	4
HA	20	C_section	Multiparous	No	Singleton	C-section before labor	34	Cephalic	4
HA	29	C_section	Multiparous	No	Singleton	C-section before labor	39	Cephalic	4
HA	36	C_section	Multiparous	No	Singleton	C-section before labor	38	Cephalic	4
HA	34	C_section	Multiparous	No	Singleton	C-section before labor	37	Cephalic	4
HB	33	C_section	Multiparous	No	Singleton	Induced labor	38	Cephalic	4
HA	27	C_section	Multiparous	No	Singleton	C-section before labor	38	Cephalic	4
HA	25	C_section	Multiparous	No	Singleton	Induced labor	37	Cephalic	4
HB	26	C_section	Multiparous	No	Singleton	C-section before labor	39	Cephalic	4
HA	44	C_section	Multiparous	No	Singleton	C-section before labor	39	Cephalic	4
HB	41	C_section	Multiparous	No	Singleton	Induced labor	41	Cephalic	4
HA	41	C_section	Multiparous	No	Singleton	Induced labor	38	Cephalic	4
HB	38	C_section	Multiparous	No	Singleton	Induced labor	37	Cephalic	4
HA	36	C_section	Multiparous	No	Singleton	C-section before labor	41	Cephalic	4
HB	36	C_section	Multiparous	No	Singleton	C-section before labor	38	Cephalic	4
HA	35	C_section	Multiparous	No	Singleton	Induced labor	41	Cephalic	4
HA	34	C_section	Multiparous	No	Singleton	Induced labor	41	Cephalic	4
HB	34	C_section	Multiparous	No	Singleton	Induced labor	41	Cephalic	4
HA	32	C_section	Multiparous	No	Singleton	C-section before labor	39	Cephalic	4
HA	31	C_section	Multiparous	No	Singleton	Induced labor	37	Cephalic	4
HB	31	C_section	Multiparous	No	Singleton	C-section before labor	40	Cephalic	4
HA	30	C_section	Multiparous	No	Singleton	Induced labor	40	Cephalic	4
HA	29	C_section	Multiparous	No	Singleton	Induced labor	41	Cephalic	4
HB	29	C_section	Multiparous	No	Singleton	Induced labor	41	Cephalic	4
HA	29	C_section	Multiparous	No	Singleton	Spontaneous labor	39	Cephalic	4
HA	29	C_section	Multiparous	No	Singleton	Induced labor	41	Cephalic	4
HB	28	C_section	Multiparous	No	Singleton	C-section before labor	41	Cephalic	4
HB	27	C_section	Multiparous	No	Singleton	C-section before labor	40	Cephalic	4
HB	27	C_section	Nuliparous	No	Singleton	Induced labor	40	Cephalic	4
HA	26	C_section	Multiparous	No	Singleton	C-section before labor	39	Cephalic	4
HA	26	C_section	Multiparous	No	Singleton	Spontaneous labor	41	Cephalic	4
HB	23	C_section	Multiparous	No	Singleton	Induced labor	41	Cephalic	4
HA	21	C_section	Multiparous	No	Singleton	Induced labor	41	Cephalic	4
HA	19	C_section	Multiparous	No	Singleton	C-section before labor	40	Cephalic	4
HA	19	C_section	Multiparous	No	Singleton	Induced labor	41	Cephalic	4
HA	23	C_section	Multiparous	No	Singleton	C-section before labor	40	Cephalic	4
HA	44	C_section	Multiparous	No	Singleton	C-section before labor	38	Cephalic	4
HB	41	C_section	Multiparous	No	Singleton	C-section before labor	38	Cephalic	4
HA	39	C_section	Multiparous	No	Singleton	C-section before labor	41	Cephalic	4
HA	36	C_section	Multiparous	No	Singleton	C-section before labor	38	Cephalic	4
HB	36	C_section	Multiparous	No	Singleton	C-section before labor	40	Cephalic	4
HA	34	C_section	Multiparous	No	Singleton	C-section before labor	38	Cephalic	4
HA	33	C_section	Multiparous	No	Singleton	C-section before labor	38	Cephalic	4
HA	28	C_section	Multiparous	No	Singleton	C-section before labor	38	Cephalic	4
HA	35	C_section	Multiparous	No	Singleton	C-section before labor	37	Cephalic	4
HA	34	C_section	Multiparous	No	Singleton	C-section before labor	39	Cephalic	4
HA	32	C_section	Multiparous	No	Singleton	C-section before labor	37	Cephalic	4
HA	28	C_section	Multiparous	No	Singleton	C-section before labor	37	Cephalic	4
HA	26	C_section	Multiparous	No	Singleton	C-section before labor	39	Cephalic	4
HA	44	C_section	Multiparous	No	Singleton	Induced labor	40	Cephalic	4
HA	35	C_section	Multiparous	No	Singleton	Induced labor	39	Cephalic	4
HA	34	C_section	Multiparous	No	Singleton	C-section before labor	38	Cephalic	4
HA	32	C_section	Multiparous	No	Singleton	C-section before labor	41	Cephalic	4
HA	31	C_section	Multiparous	No	Singleton	C-section before labor	38	Cephalic	4
HA	30	C_section	Multiparous	No	Singleton	C-section before labor	41	Cephalic	4
HA	28	C_section	Multiparous	No	Singleton	Induced labor	41	Cephalic	4
HA	27	C_section	Multiparous	No	Singleton	C-section before labor	40	Cephalic	4
HA	26	C_section	Multiparous	No	Singleton	Induced labor	41	Cephalic	4
HA	31	C_section	Multiparous	No	Singleton	Induced labor	41	Cephalic	4
HA	34	C_section	Multiparous	No	Singleton	Induced labor	37	Cephalic	4
HA	28	C_section	Multiparous	No	Singleton	Spontaneous labor	40	Cephalic	3
HA	30	C_section	Multiparous	No	Singleton	Spontaneous labor	37	Cephalic	3
HA	30	C_section	Multiparous	No	Singleton	Spontaneous labor	37	Cephalic	3
HA	26	C_section	Multiparous	No	Singleton	Spontaneous labor	39	Cephalic	3
HA	25	C_section	Multiparous	No	Singleton	Spontaneous labor	41	Cephalic	3
HA	22	C_section	Multiparous	No	Singleton	Spontaneous labor	39	Cephalic	3
HA	39	C_section	Multiparous	No	Singleton	Spontaneous labor	40	Cephalic	3
HA	38	C_section	Multiparous	No	Singleton	Spontaneous labor	38	Cephalic	3
HA	36	C_section	Multiparous	No	Singleton	Spontaneous labor	40	Cephalic	3
HA	35	C_section	Multiparous	No	Singleton	Spontaneous labor	37	Cephalic	3
HA	33	C_section	Multiparous	No	Singleton	Spontaneous labor	41	Cephalic	3
HB	33	C_section	Multiparous	No	Singleton	Spontaneous labor	38	Cephalic	3
HA	32	C_section	Multiparous	No	Singleton	Spontaneous labor	40	Cephalic	3
HA	32	C_section	Multiparous	No	Singleton	Spontaneous labor	39	Cephalic	3
HA	31	C_section	Multiparous	No	Singleton	Spontaneous labor	39	Cephalic	3
HA	31	C_section	Multiparous	No	Singleton	Spontaneous labor	41	Cephalic	3
HA	31	C_section	Multiparous	No	Singleton	Spontaneous labor	39	Cephalic	3
HA	30	C_section	Multiparous	No	Singleton	Spontaneous labor	40	Cephalic	3
HB	29	C_section	Multiparous	No	Singleton	Spontaneous labor	40	Cephalic	3
HA	29	C_section	Multiparous	No	Singleton	Spontaneous labor	39	Cephalic	3
HA	29	C_section	Multiparous	No	Singleton	Spontaneous labor	39	Cephalic	3
HA	29	C_section	Multiparous	No	Singleton	Spontaneous labor	40	Cephalic	3
HB	28	C_section	Multiparous	No	Singleton	Spontaneous labor	40	Cephalic	3
HA	28	C_section	Multiparous	No	Singleton	Spontaneous labor	41	Cephalic	3
HA	28	C_section	Multiparous	No	Singleton	Spontaneous labor	40	Cephalic	3
HB	27	C_section	Multiparous	No	Singleton	Spontaneous labor	41	Cephalic	3
HB	27	C_section	Multiparous	No	Singleton	Spontaneous labor	41	Cephalic	3
HA	22	C_section	Multiparous	No	Singleton	Spontaneous labor	39	Cephalic	3
HA	21	C_section	Multiparous	No	Singleton	Spontaneous labor	40	Cephalic	3
HA	21	C_section	Multiparous	Yes	Singleton	Spontaneous labor	41	Cephalic	3
HB	20	C_section	Multiparous	No	Singleton	Spontaneous labor	39	Cephalic	3
HA	18	C_section	Multiparous	No	Singleton	Spontaneous labor	41	Cephalic	3
HA	26	C_section	Multiparous	No	Singleton	Spontaneous labor	42	Cephalic	3
HA	43	C_section	Multiparous	No	Singleton	Spontaneous labor	41	Cephalic	3
HA	22	C_section	Multiparous	No	Singleton	Spontaneous labor	41	Cephalic	3
HA	19	C_section	Multiparous	No	Singleton	Spontaneous labor	40	Cephalic	3
HA	24	C_section	Multiparous	No	Singleton	Spontaneous labor	40	Cephalic	3
HA	37	C_section	Multiparous	No	Singleton	Spontaneous labor	39	Cephalic	3
HA	36	C_section	Multiparous	No	Singleton	Spontaneous labor	39	Cephalic	3
HA	35	C_section	Multiparous	No	Singleton	Spontaneous labor	38	Cephalic	3
HB	35	C_section	Multiparous	No	Singleton	Spontaneous labor	40	Cephalic	3
HA	34	C_section	Multiparous	No	Singleton	Spontaneous labor	40	Cephalic	3
HA	32	C_section	Multiparous	No	Singleton	Spontaneous labor	38	Cephalic	3
HA	31	C_section	Multiparous	No	Singleton	Spontaneous labor	39	Cephalic	3
HA	31	C_section	Multiparous	No	Singleton	Spontaneous labor	40	Cephalic	3
HA	31	C_section	Multiparous	No	Singleton	Spontaneous labor	39	Cephalic	3
HB	31	C_section	Multiparous	No	Singleton	Spontaneous labor	40	Cephalic	3
HA	30	C_section	Multiparous	No	Singleton	Spontaneous labor	39	Cephalic	3
HA	30	C_section	Multiparous	No	Singleton	Spontaneous labor	41	Cephalic	3
HA	30	C_section	Multiparous	No	Singleton	Spontaneous labor	40	Cephalic	3
HA	29	C_section	Multiparous	No	Singleton	Spontaneous labor	40	Cephalic	3
HA	29	C_section	Multiparous	No	Singleton	Spontaneous labor	40	Cephalic	3
HA	29	C_section	Multiparous	No	Singleton	Spontaneous labor	39	Cephalic	3
HA	28	C_section	Multiparous	No	Singleton	Spontaneous labor	39	Cephalic	3
HA	26	C_section	Multiparous	No	Singleton	Spontaneous labor	40	Cephalic	3
HA	26	C_section	Multiparous	No	Singleton	Spontaneous labor	40	Cephalic	3
HB	26	C_section	Multiparous	No	Singleton	Spontaneous labor	39	Cephalic	3
HB	26	C_section	Multiparous	No	Singleton	Spontaneous labor	39	Cephalic	3
HA	25	C_section	Multiparous	No	Singleton	Spontaneous labor	41	Cephalic	3
HA	24	C_section	Multiparous	No	Singleton	Spontaneous labor	41	Cephalic	3
HA	23	C_section	Multiparous	No	Singleton	Spontaneous labor	40	Cephalic	3
HA	22	C_section	Multiparous	No	Singleton	Spontaneous labor	38	Cephalic	3
HA	21	C_section	Multiparous	No	Singleton	Spontaneous labor	41	Cephalic	3
HB	23	C_section	Multiparous	No	Singleton	Spontaneous labor	40	Cephalic	3
HA	36	C_section	Multiparous	No	Singleton	Spontaneous labor	40	Cephalic	3
HA	34	C_section	Multiparous	No	Singleton	Spontaneous labor	38	Cephalic	3
HA	33	C_section	Multiparous	No	Singleton	Spontaneous labor	41	Cephalic	3
HA	28	C_section	Multiparous	No	Singleton	Spontaneous labor	41	Cephalic	3
HA	27	C_section	Multiparous	No	Singleton	Spontaneous labor	42	Cephalic	3
HA	26	C_section	Multiparous	No	Singleton	Spontaneous labor	38	Cephalic	3
HA	26	C_section	Multiparous	No	Singleton	Spontaneous labor	39	Cephalic	3
HB	23	C_section	Multiparous	No	Singleton	Spontaneous labor	41	Cephalic	3
HA	45	C_section	Multiparous	No	Singleton	Induced labor	40	Cephalic	3
HA	44	C_section	Multiparous	No	Singleton	Spontaneous labor	40	Cephalic	3
HA	38	C_section	Multiparous	No	Singleton	Spontaneous labor	40	Cephalic	3
HA	37	C_section	Multiparous	No	Singleton	Spontaneous labor	37	Cephalic	3
HA	36	C_section	Multiparous	No	Singleton	Spontaneous labor	41	Cephalic	3
HA	35	C_section	Multiparous	No	Singleton	Spontaneous labor	40	Cephalic	3
HA	34	C_section	Multiparous	No	Singleton	Spontaneous labor	40	Cephalic	3
HA	30	C_section	Multiparous	No	Singleton	Spontaneous labor	39	Cephalic	3
HA	28	C_section	Multiparous	No	Singleton	Spontaneous labor	41	Cephalic	3
HA	27	C_section	Multiparous	No	Singleton	Spontaneous labor	40	Cephalic	3
HA	24	C_section	Multiparous	No	Singleton	Spontaneous labor	39	Cephalic	3
HA	47	C_section	Multiparous	No	Singleton	Spontaneous labor	40	Cephalic	3
HA	39	C_section	Multiparous	No	Singleton	Spontaneous labor	37	Cephalic	3
HA	29	C_section	Multiparous	No	Singleton	Spontaneous labor	37	Cephalic	3
HA	26	C_section	Multiparous	No	Singleton	Spontaneous labor	41	Cephalic	3
HA	25	C_section	Multiparous	No	Singleton	Spontaneous labor	38	Cephalic	3
HA	20	C_section	Multiparous	No	Singleton	Spontaneous labor	39	Cephalic	3
HA	20	C_section	Multiparous	No	Singleton	Spontaneous labor	37	Cephalic	3
HA	19	C_section	Multiparous	No	Singleton	Spontaneous labor	37	Cephalic	3
HA	17	C_section	Multiparous	No	Singleton	Spontaneous labor	40	Cephalic	3
HA	44	C_section	Multiparous	No	Singleton	Spontaneous labor	39	Cephalic	3
HA	38	C_section	Multiparous	No	Singleton	Spontaneous labor	38	Cephalic	3
HB	38	C_section	Multiparous	No	Singleton	Spontaneous labor	41	Cephalic	3
HA	37	C_section	Multiparous	No	Singleton	Spontaneous labor	39	Cephalic	3
HA	35	C_section	Multiparous	No	Singleton	Spontaneous labor	41	Cephalic	3
HA	34	C_section	Multiparous	No	Singleton	Spontaneous labor	40	Cephalic	3
HA	33	C_section	Multiparous	No	Singleton	Spontaneous labor	39	Cephalic	3
HA	29	C_section	Multiparous	No	Singleton	Spontaneous labor	41	Cephalic	3
HA	29	C_section	Multiparous	No	Singleton	Spontaneous labor	42	Cephalic	3
HA	28	C_section	Multiparous	No	Singleton	Spontaneous labor	40	Cephalic	3
HA	27	C_section	Multiparous	No	Singleton	Spontaneous labor	40	Cephalic	3
HA	27	C_section	Multiparous	No	Singleton	Spontaneous labor	40	Cephalic	3
HA	27	C_section	Multiparous	No	Singleton	Spontaneous labor	37	Cephalic	3
HA	26	C_section	Multiparous	No	Singleton	Spontaneous labor	41	Cephalic	3
HB	26	C_section	Multiparous	No	Singleton	Spontaneous labor	40	Cephalic	3
HA	25	C_section	Multiparous	No	Singleton	Spontaneous labor	40	Cephalic	3
HA	25	C_section	Multiparous	No	Singleton	Spontaneous labor	39	Cephalic	3
HA	21	C_section	Multiparous	No	Singleton	Spontaneous labor	39	Cephalic	3
HB	21	C_section	Multiparous	No	Singleton	Spontaneous labor	39	Cephalic	3
[truncated: 4,580 more rows]
